# Supplementary material for: An Efficient Three Component One-Pot Synthesis of 5-Amino-7-aryl-7,8-dihydro-[1,2,4] triazolo[4,3-a]-pyrimidine-6-carbonitriles
Source: PubMed Central journal article supplement (PMC6268426; doi:10.3390/molecules17021860), 2012-02-14
Supplement: molecules-17-01860-s001.pdf [file molecules-17-01860-s001.pdf]

## Supplementary Materials

**Figure S1:** The D<sub>2</sub>O exchange experiment for product **4j**. (A) Partial enlarged <sup>1</sup>H-NMR spectrum of **4j** in DMSO-*d*<sub>6</sub>; (B) Partial enlarged <sup>1</sup>H-NMR spectrum of **4j** in DMSO-*d*<sub>6</sub> + D<sub>2</sub>O.

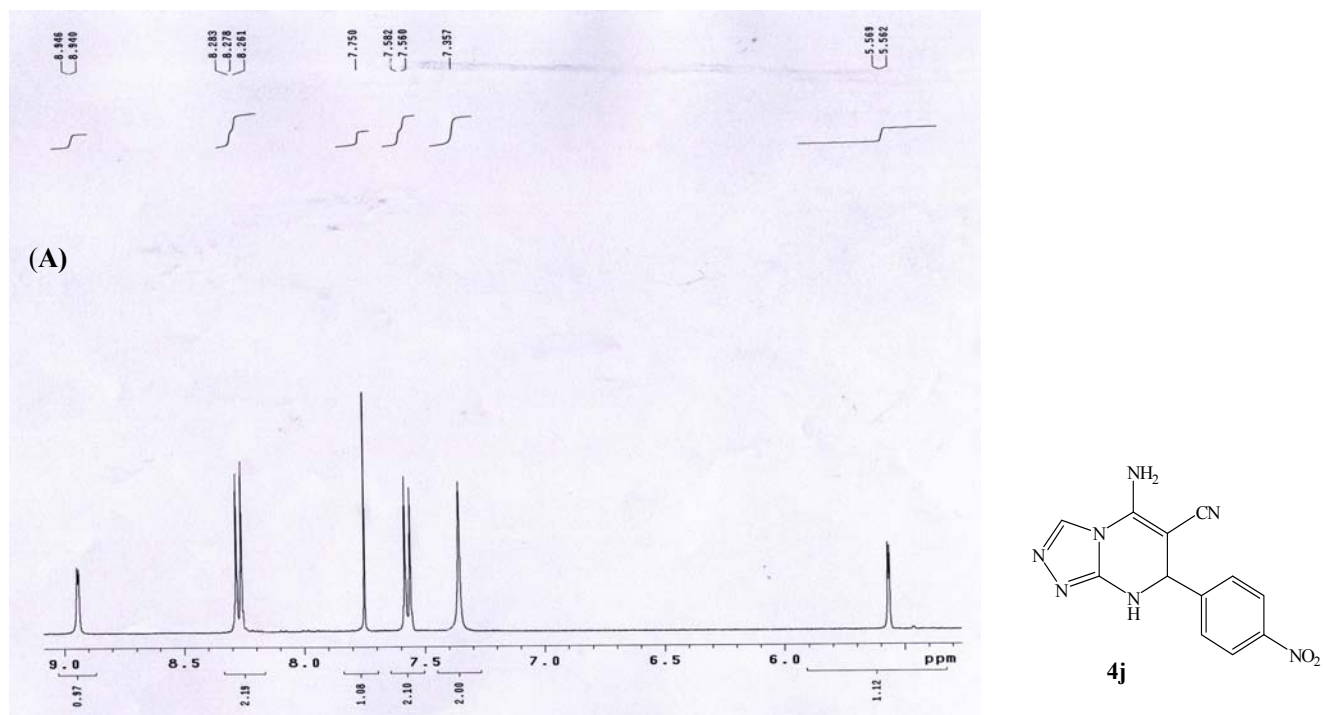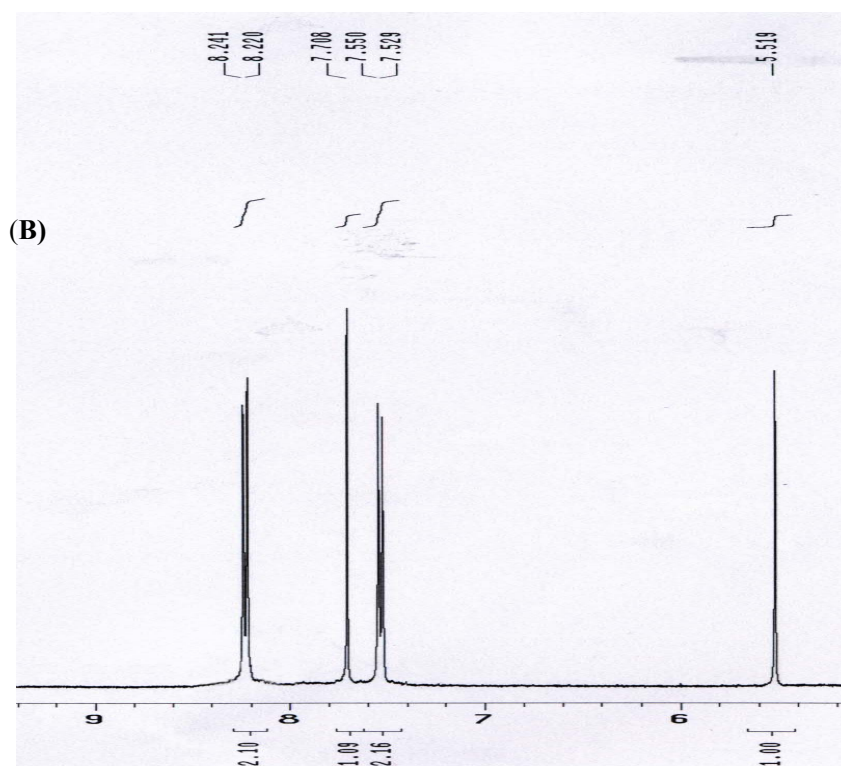

**Figure S2.** (A) The  $^{13}\text{C}$  NMR spectrum of compound 4a in DMSO; (B) The DEPT  $^{13}\text{C}$  NMR spectrum of compound 4a in DMSO.

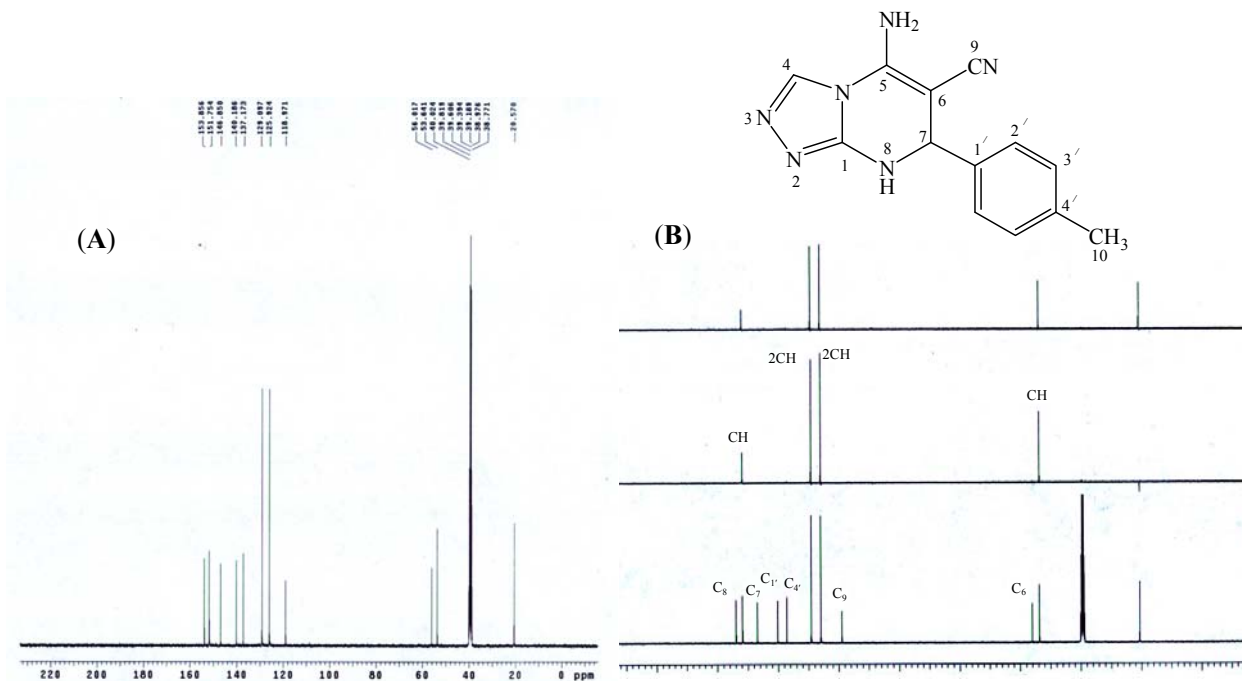

**Figure S3.** (A) The 2-D  $^1\text{H}$ - $^{13}\text{C}$  gHMBC NMR spectrum of compound 4a in DMSO; (B) HMBC correlation with  $^1\text{H}$  and  $^{13}\text{C}$  NMR of 4a.

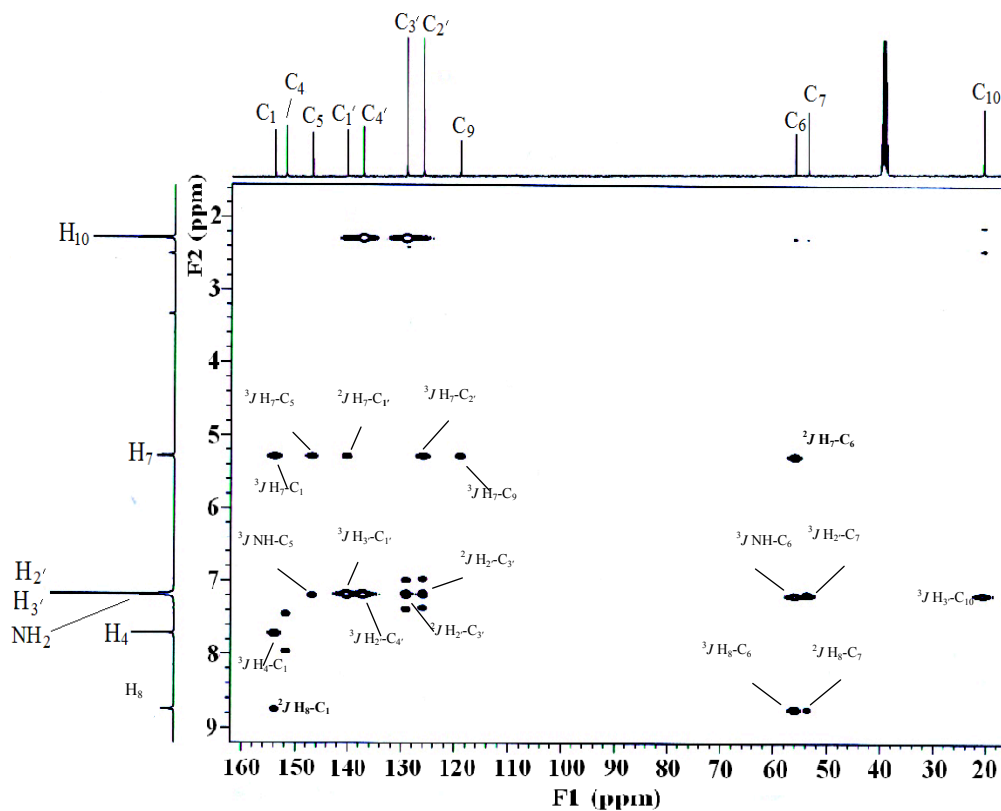

(A)

Figure S3. Cont.

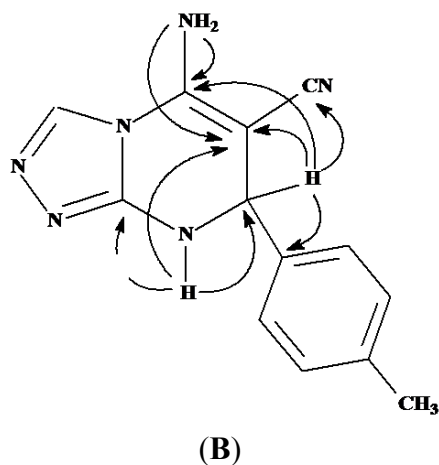

Figure S4. (a) The  $^{13}\text{C}$  NMR spectrum of compound **4f** in DMSO; (b) The DEPT  $^{13}\text{C}$  NMR spectrum of compound **4f** in DMSO.

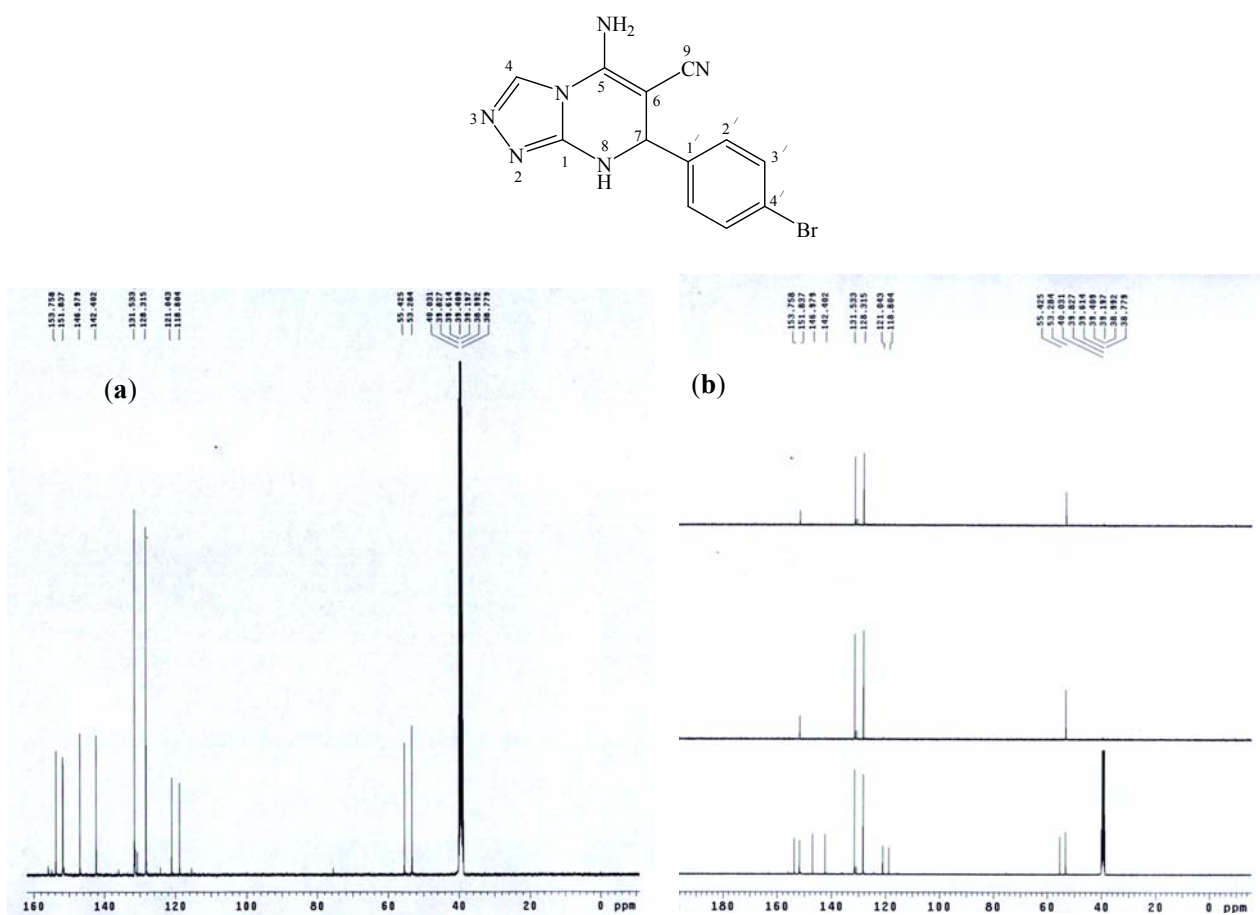

**Figure S5.**  $^1\text{H}$  NMR spectra of products; (A)  $^1\text{H}$ -NMR spectrum of **4a**; (B)  $^1\text{H}$ -NMR spectrum of **4b**; (C)  $^1\text{H}$ -NMR spectrum of **4f**; (D)  $^1\text{H}$ -NMR spectrum of **4g**; (E)  $^1\text{H}$ -NMR spectrum of **4h**; (F) Partial enlarged spectrum of **4h**; (G)  $^1\text{H}$ -NMR spectrum of **4i**; (H)  $^1\text{H}$ -NMR spectrum of **4j**; (I) Partial enlarged spectrum of **4j**; (J)  $^1\text{H}$ -NMR spectrum of **4j**; (K)  $^1\text{H}$ -NMR spectrum of **4k**; (L) Partial enlarged spectrum of **4k**; (M)  $^1\text{H}$ -NMR spectrum of **4l**; (N)  $^1\text{H}$ -NMR spectrum of **4m**.

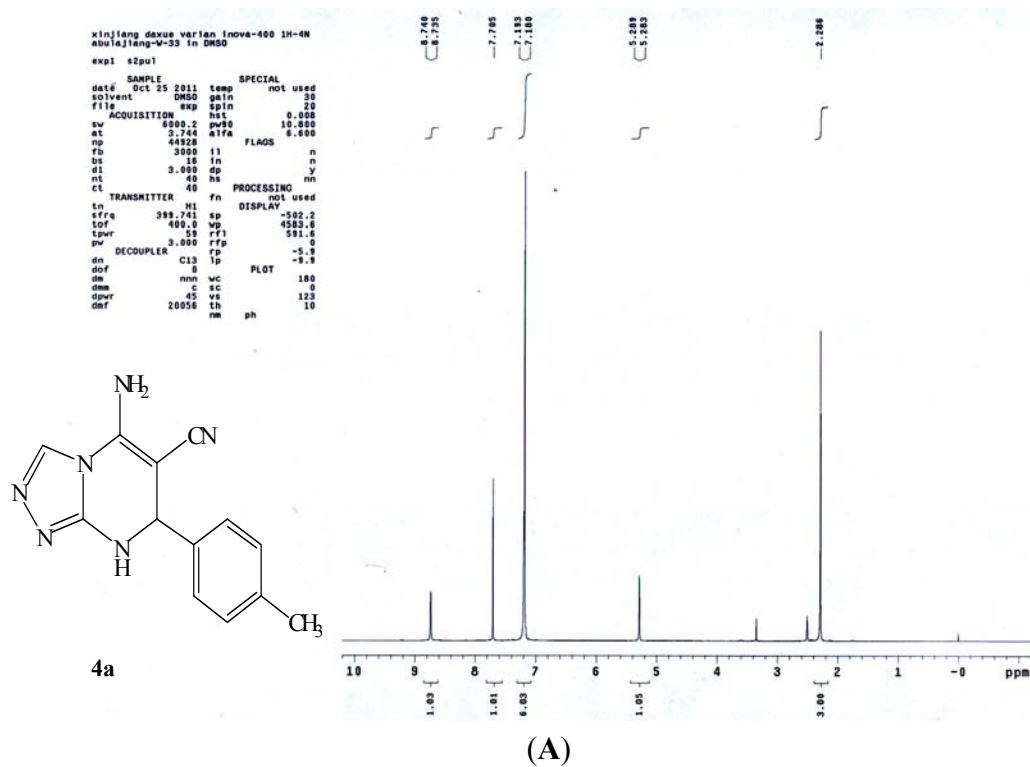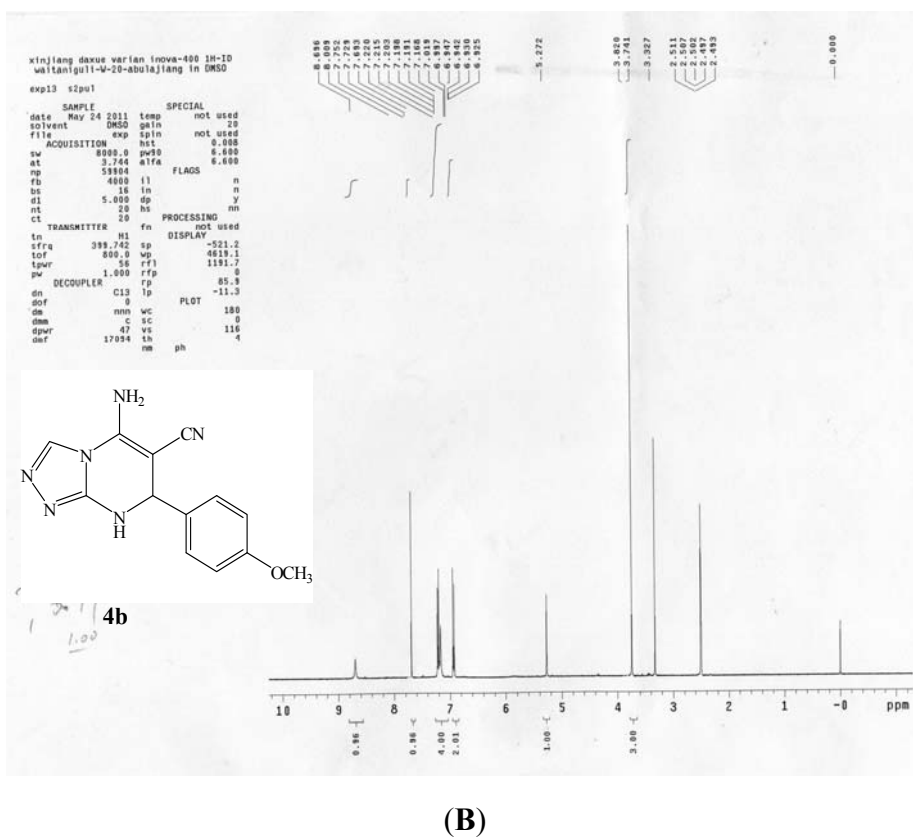

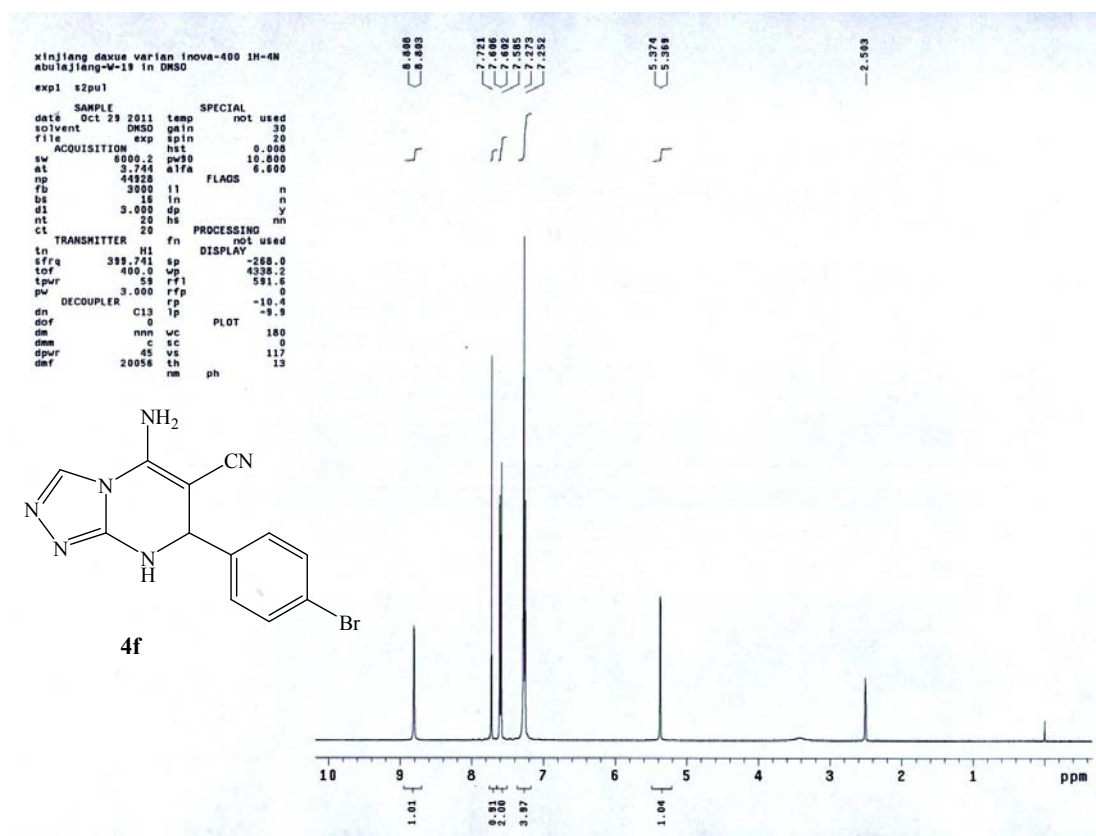

(C)

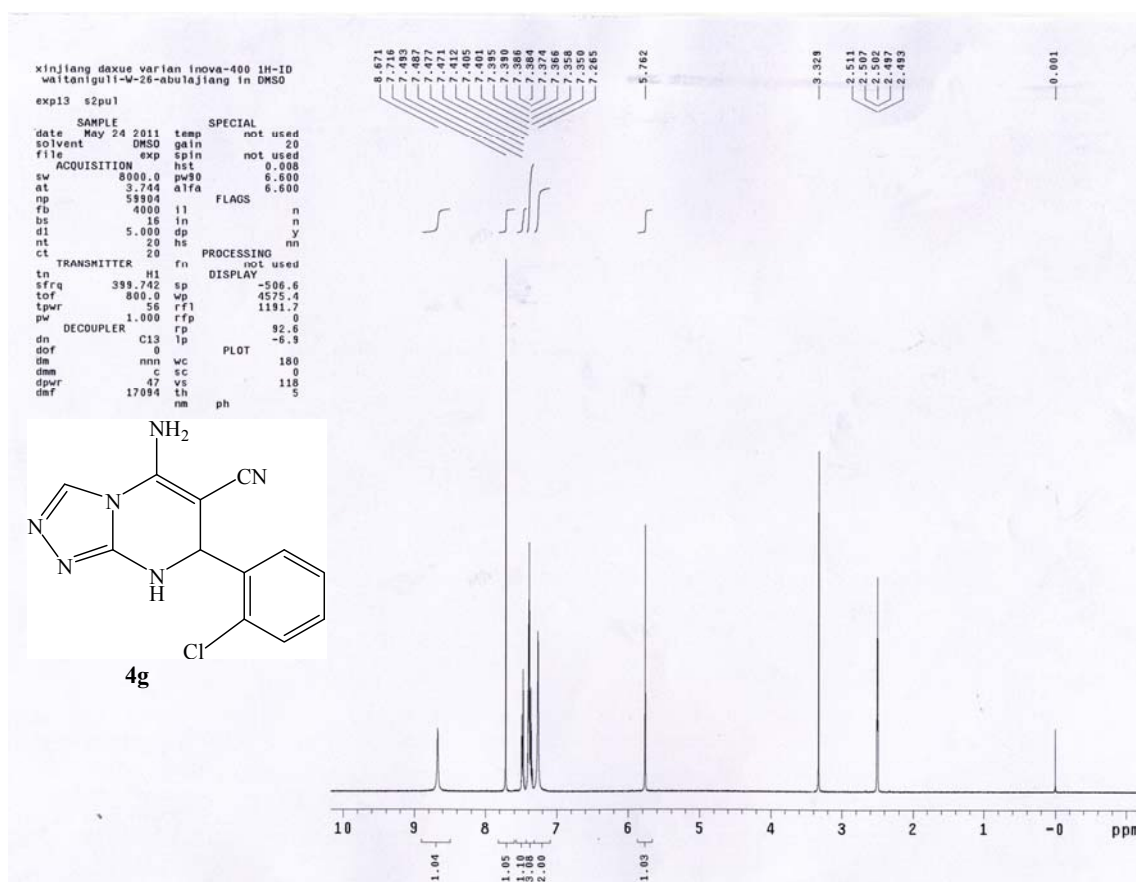

(D)

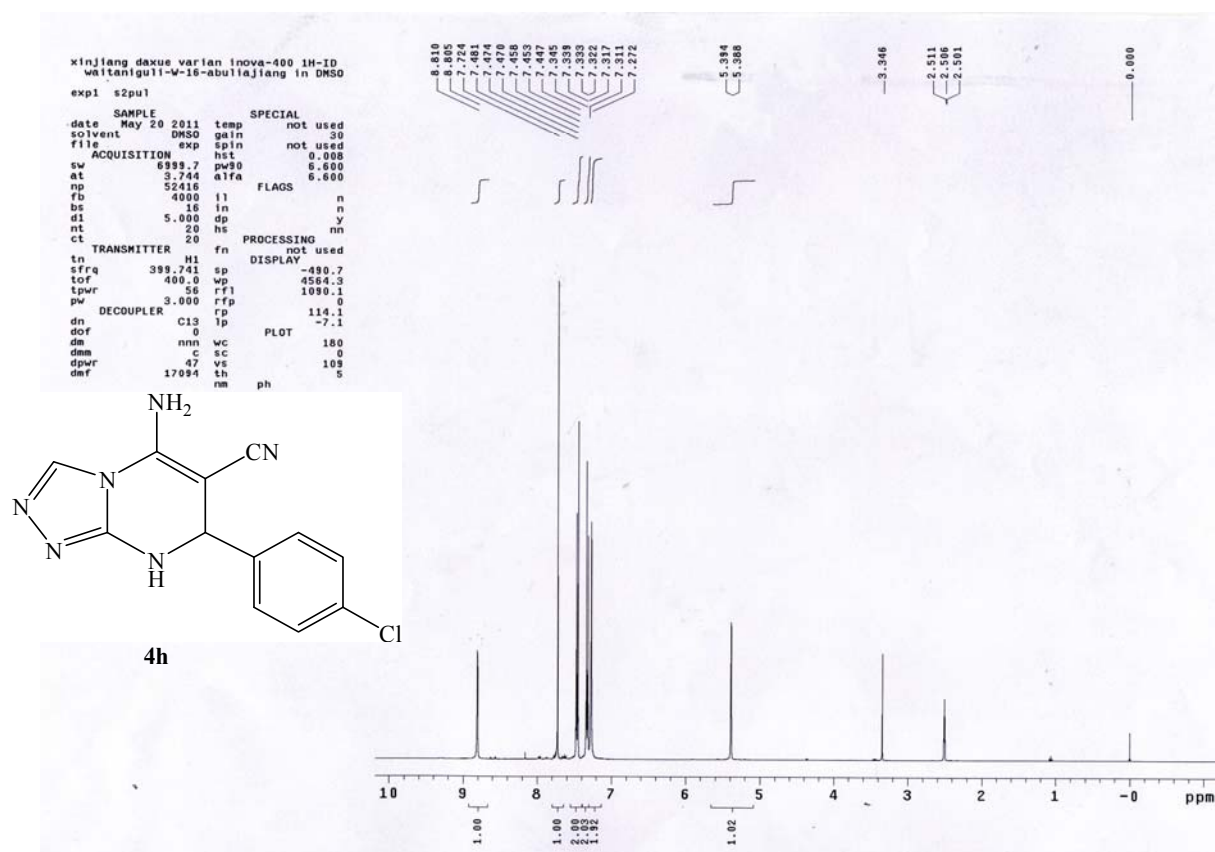

(E)

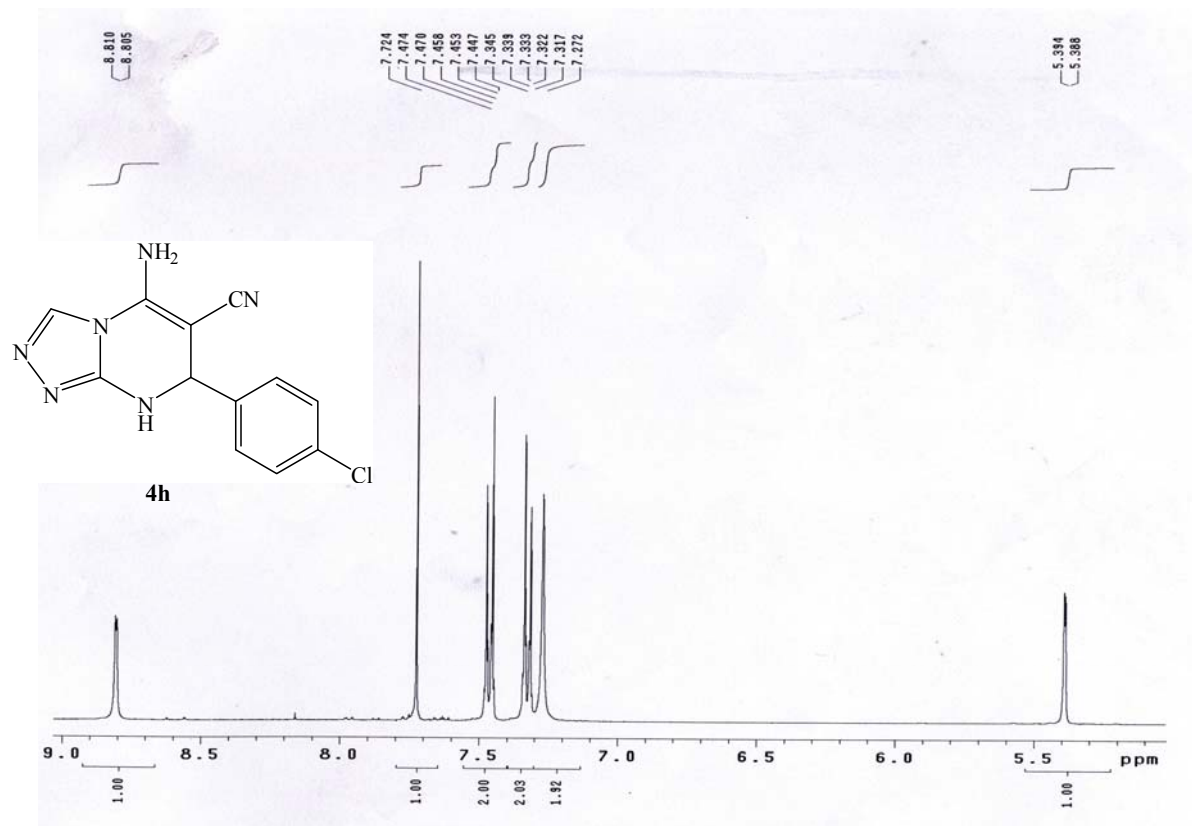

(F)

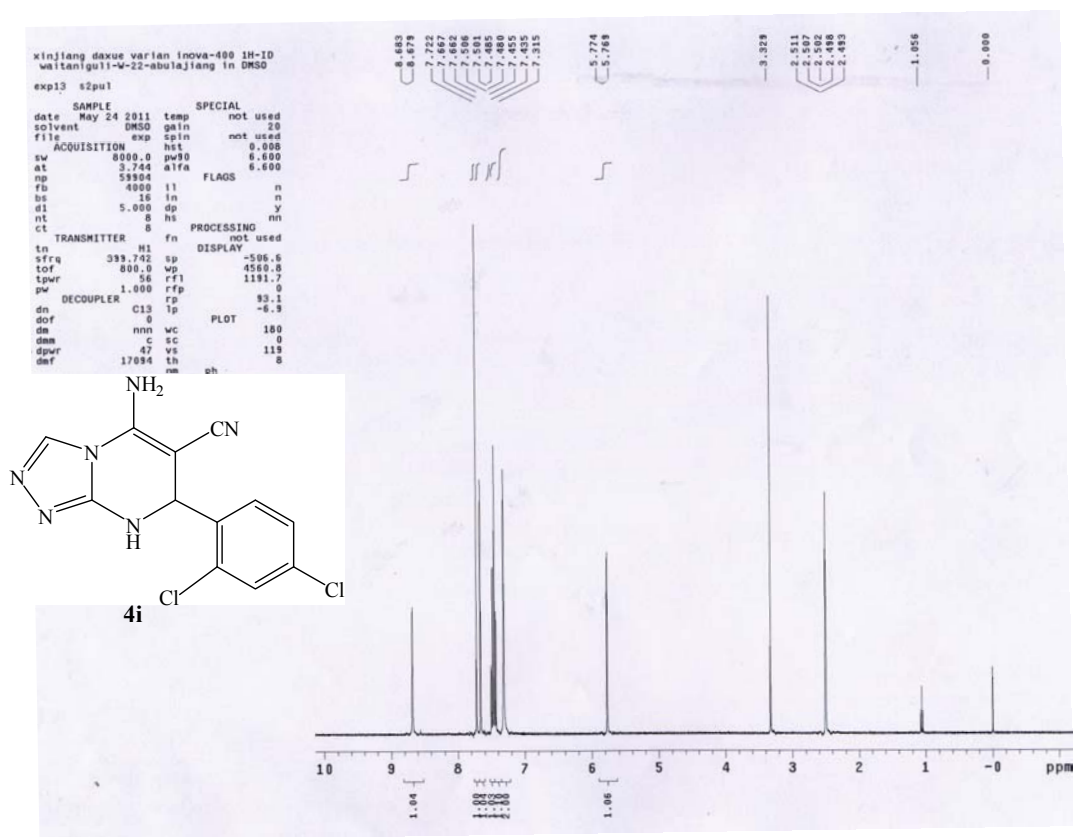

(G)

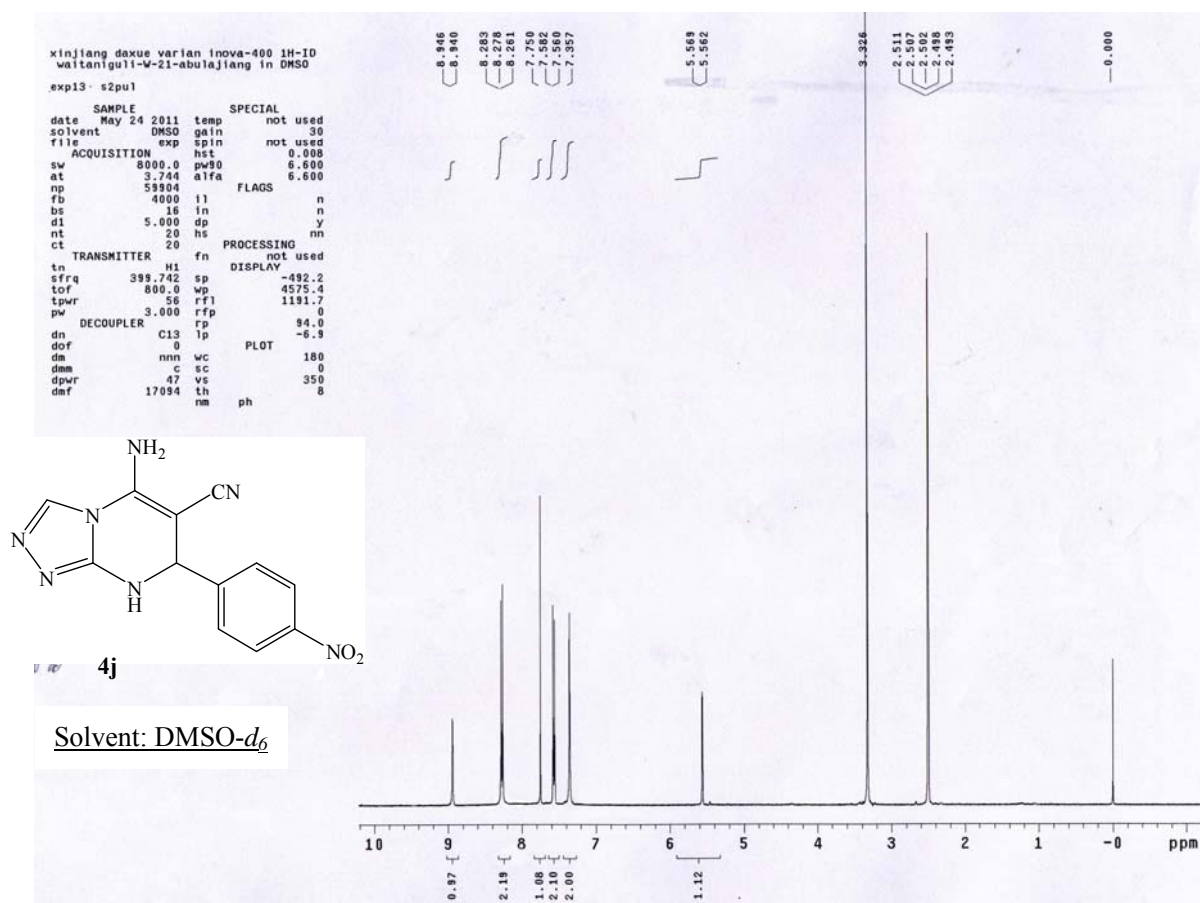

(H)

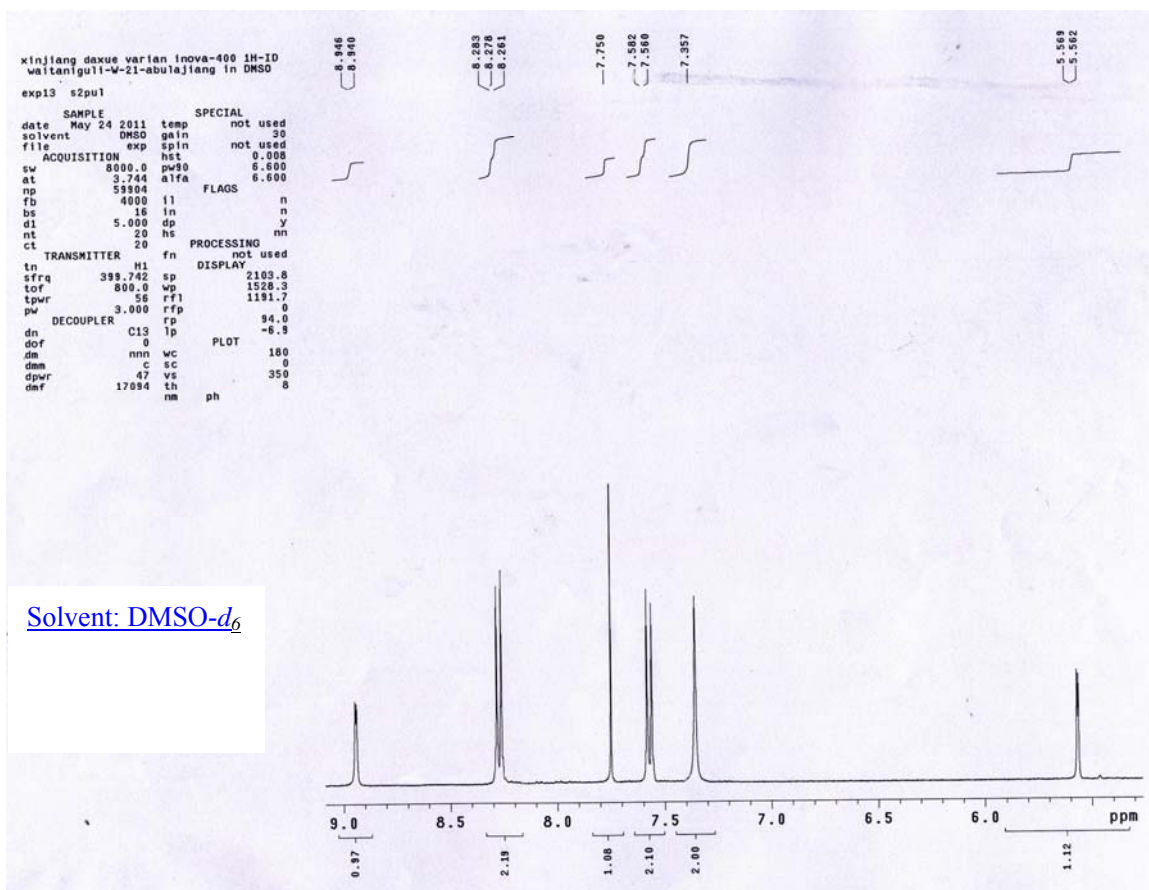

(I)

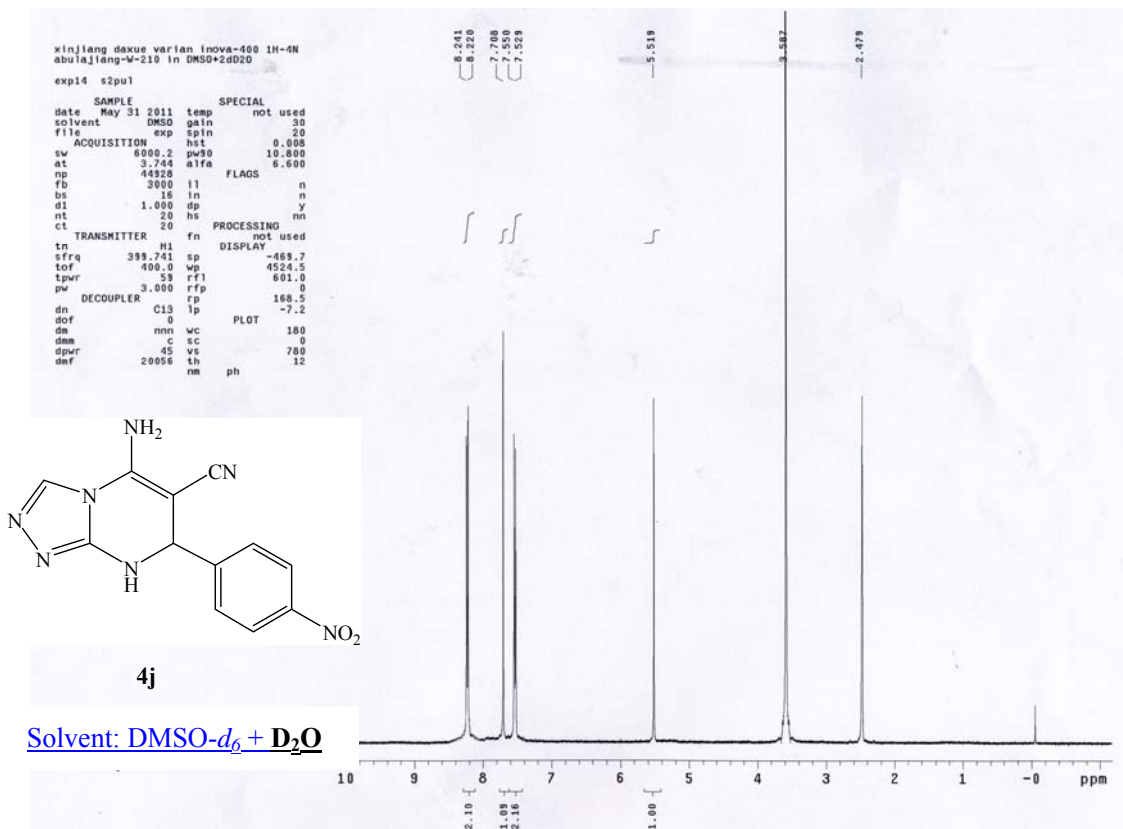

(J)



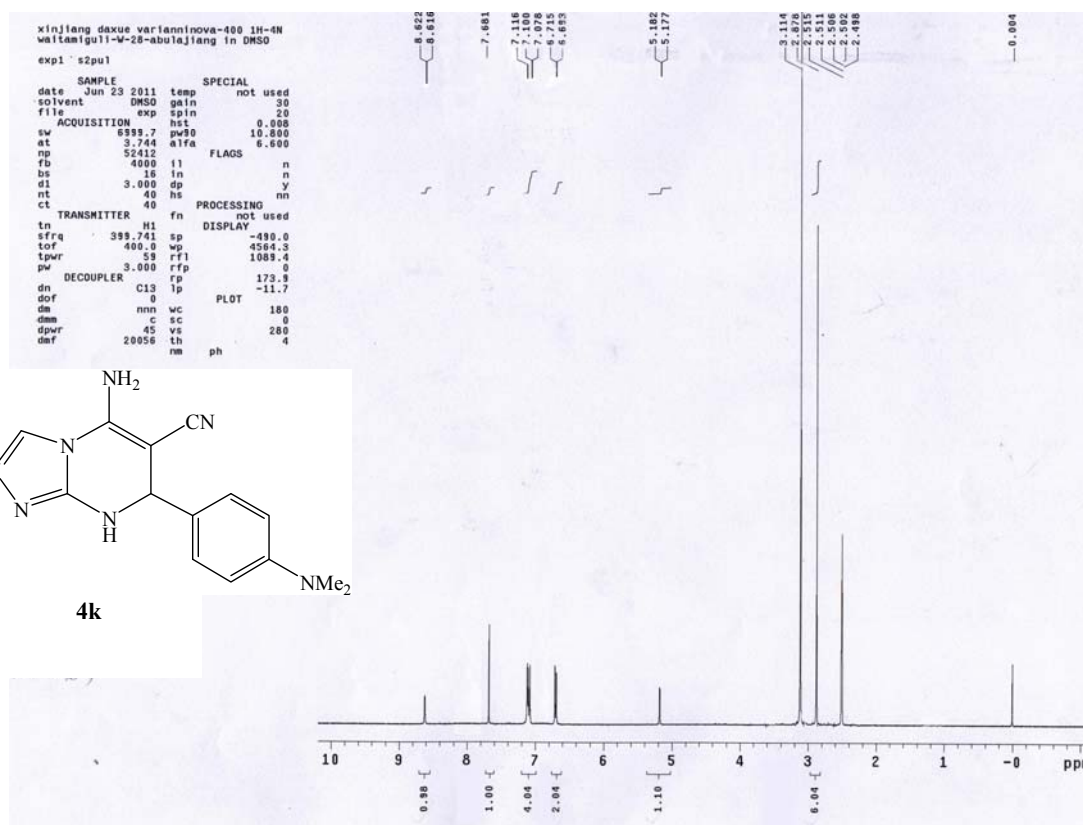

(K)

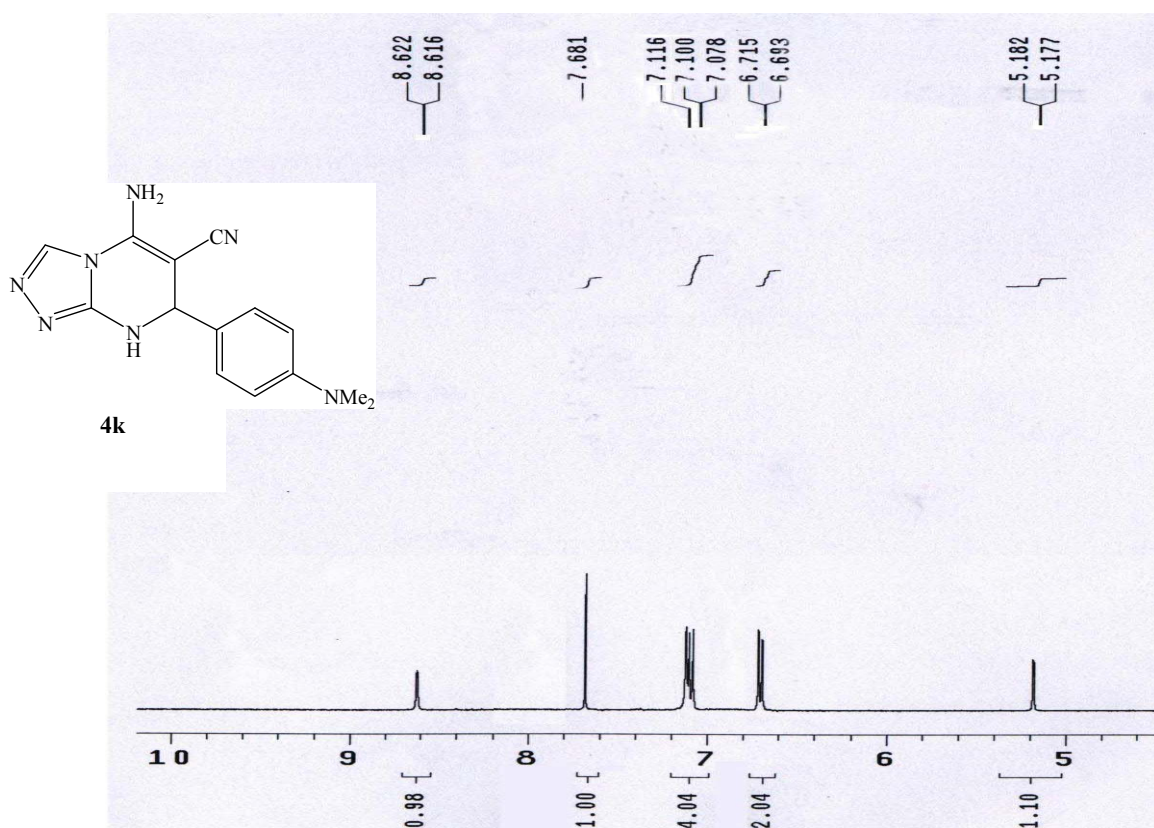

(L)

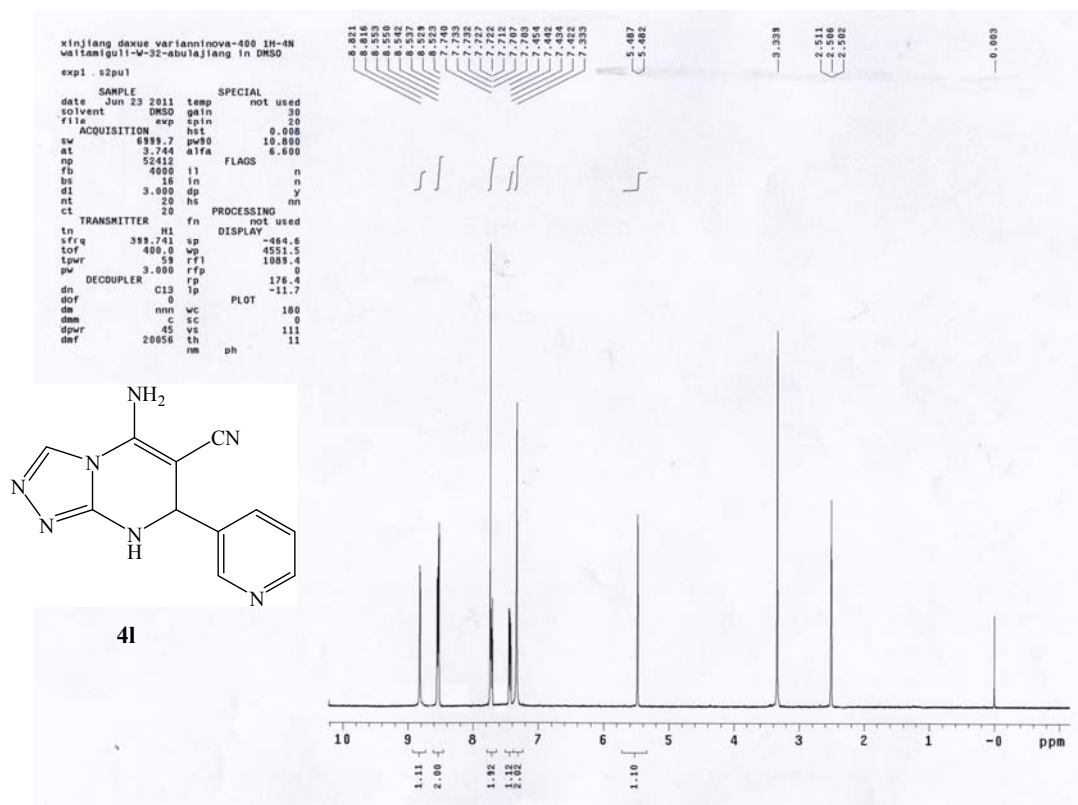

(M)

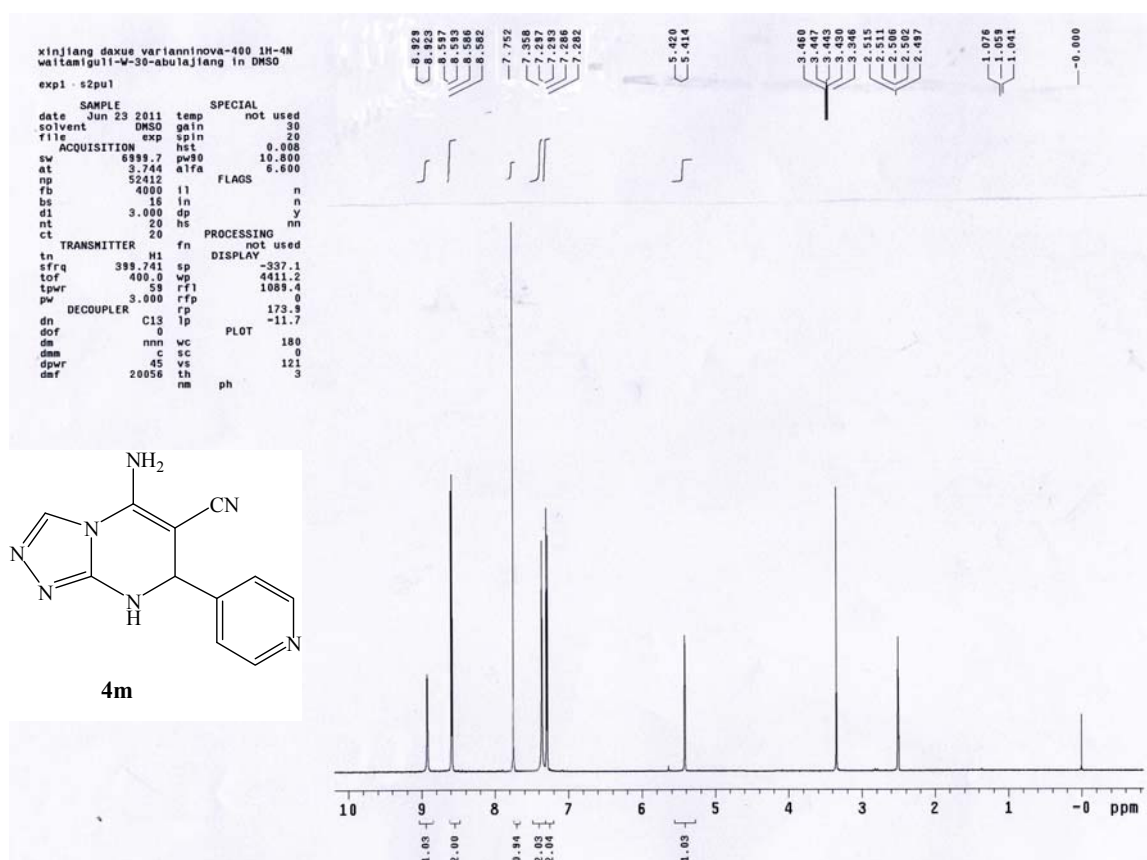

(N)

Figure 6. <sup>13</sup>C NMR spectra of products.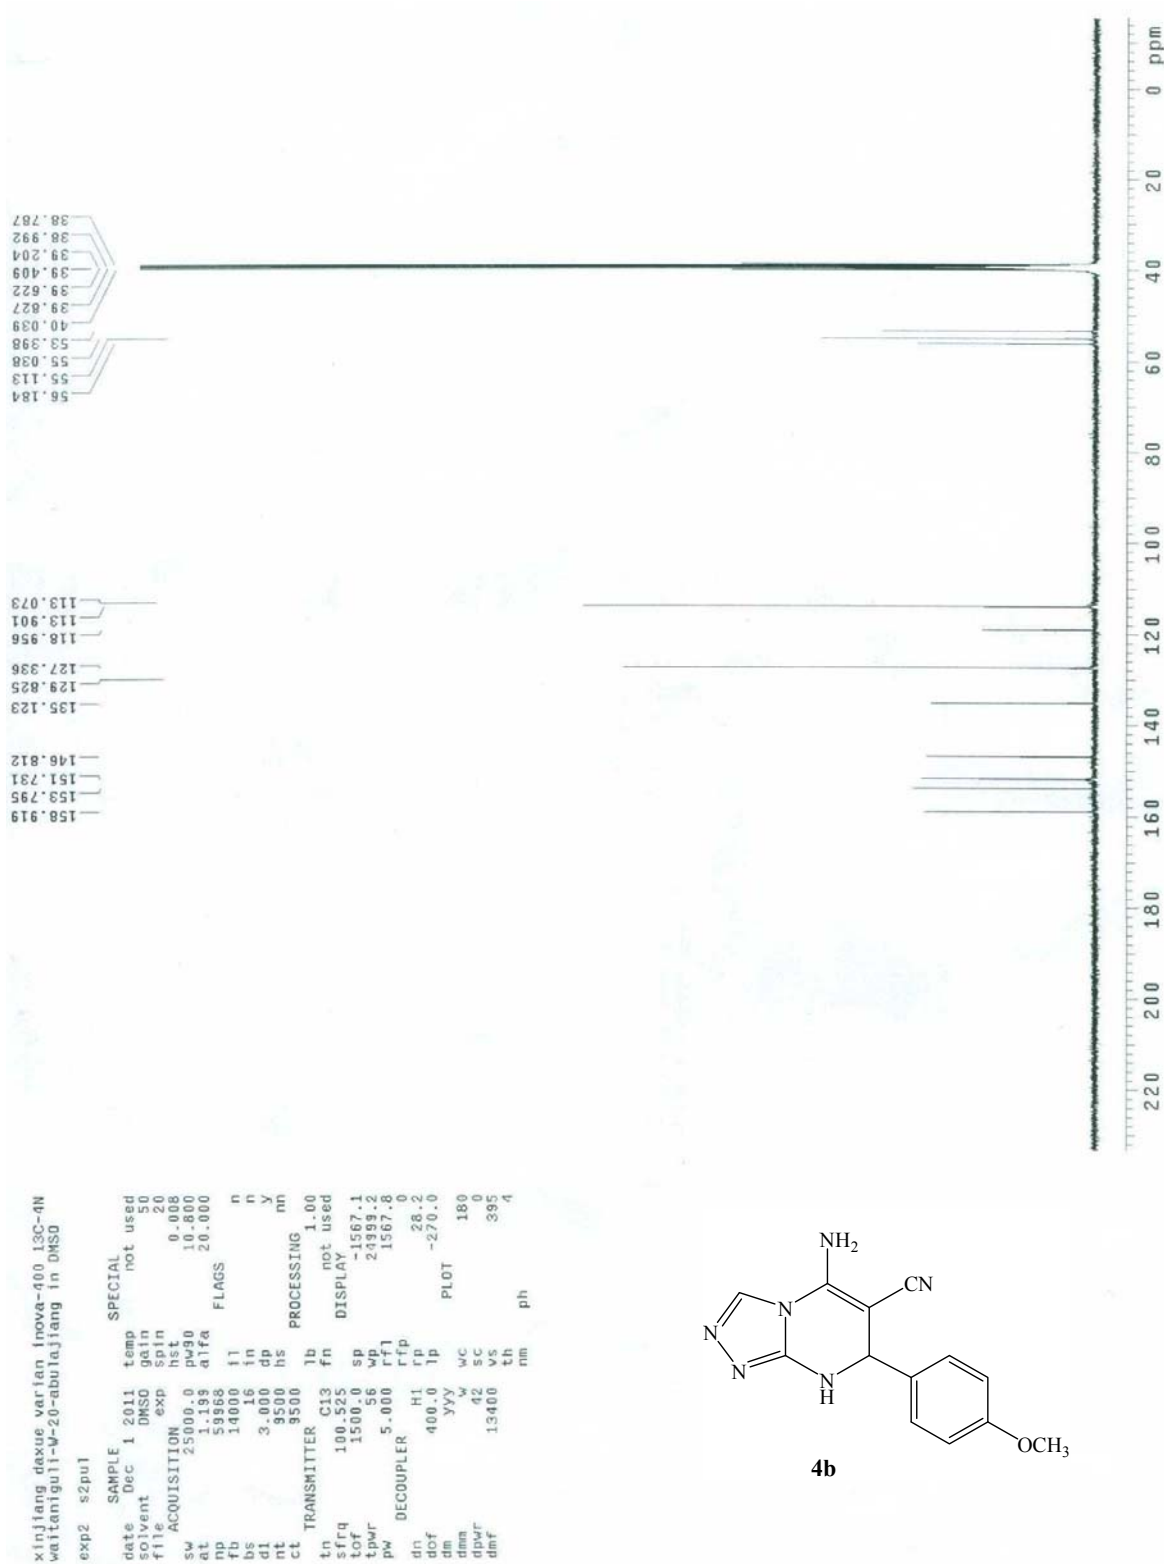

```

Xinjiang daxue varian inova-400 13C-N
wattangu11-w-25-abulajiang in DMSO
exp2 s2pu1
date Dec 2 2011 temp not used
solvent DMSO gain 50
file exp spin 20
hst 0.068
sw ACQUISITION exp 25000.0
et 1.19 d1fa 20.000
np 59968
fb 14000 l1
bs 16 in
d1 3.000 dp Y
nt 3100 hs
ct TRANSMITTER C13 lb 1.00
fn not used
sfrq 100.525
tof 1500.0 sp -1567.1
lpwr 58 wd 24999.2
pw DECOUPLER H1 rfp 1567.8
di 400.0 lp 19.3
dof YVY wc PLOT 180
dim 42 SC 382
dprf 13400 th 13
dmf nm ph
  
```

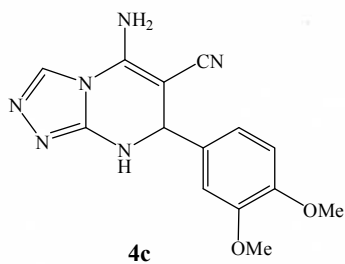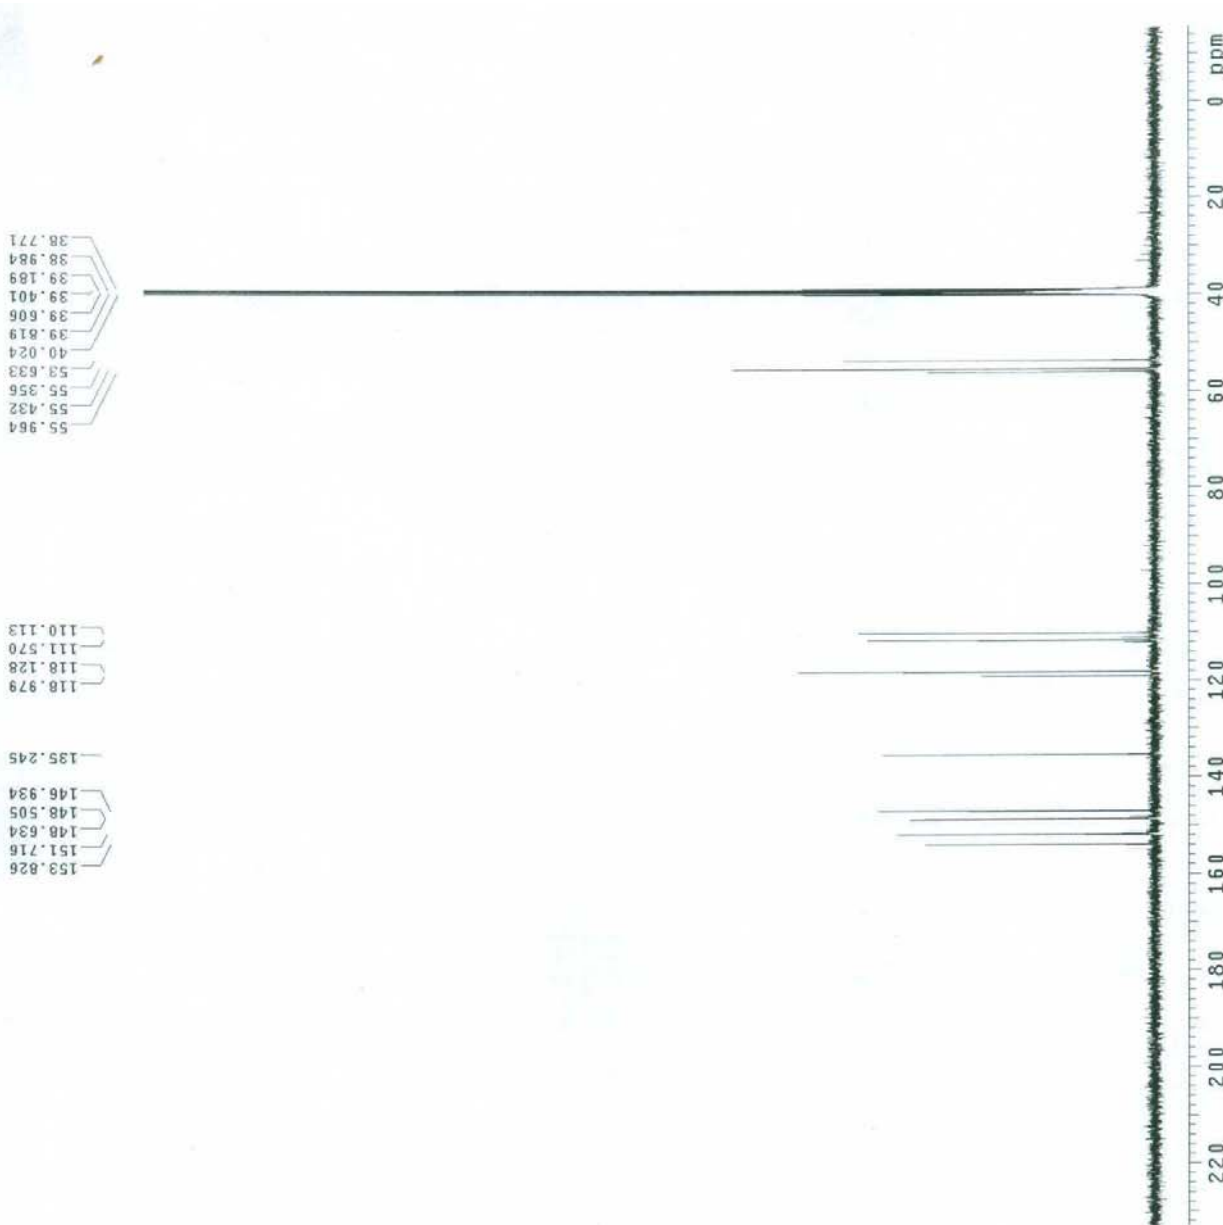

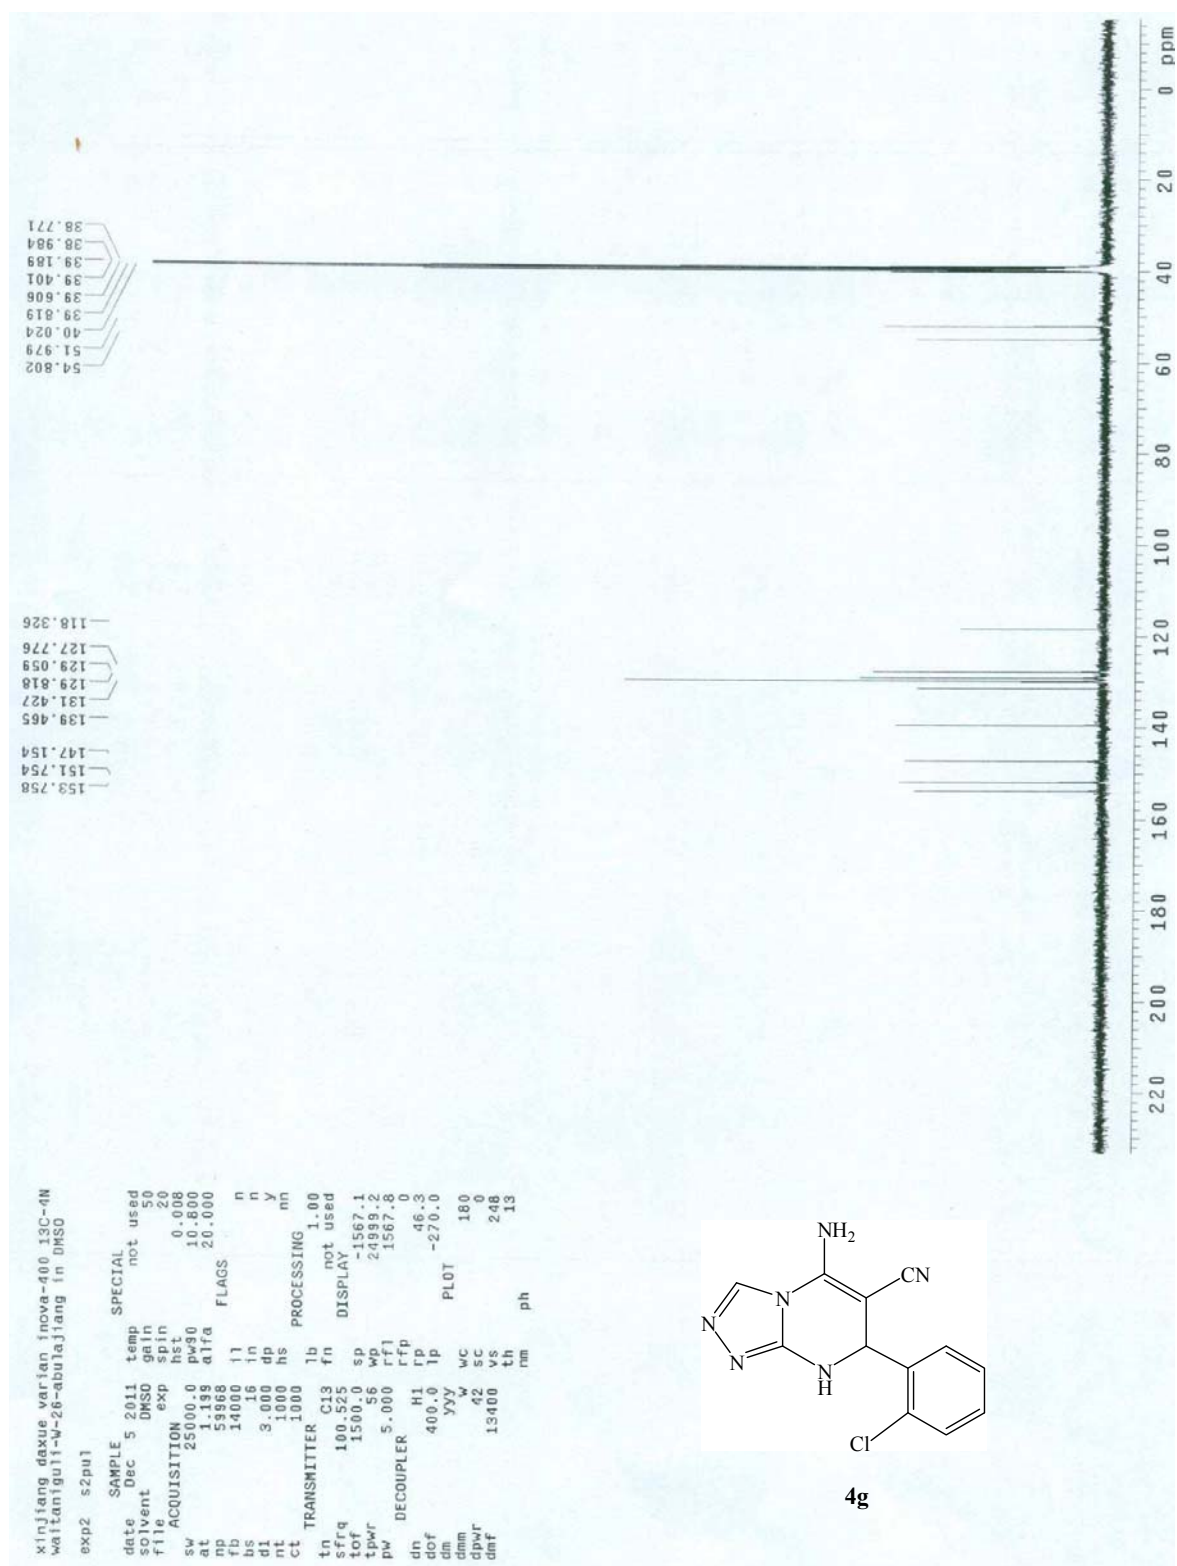

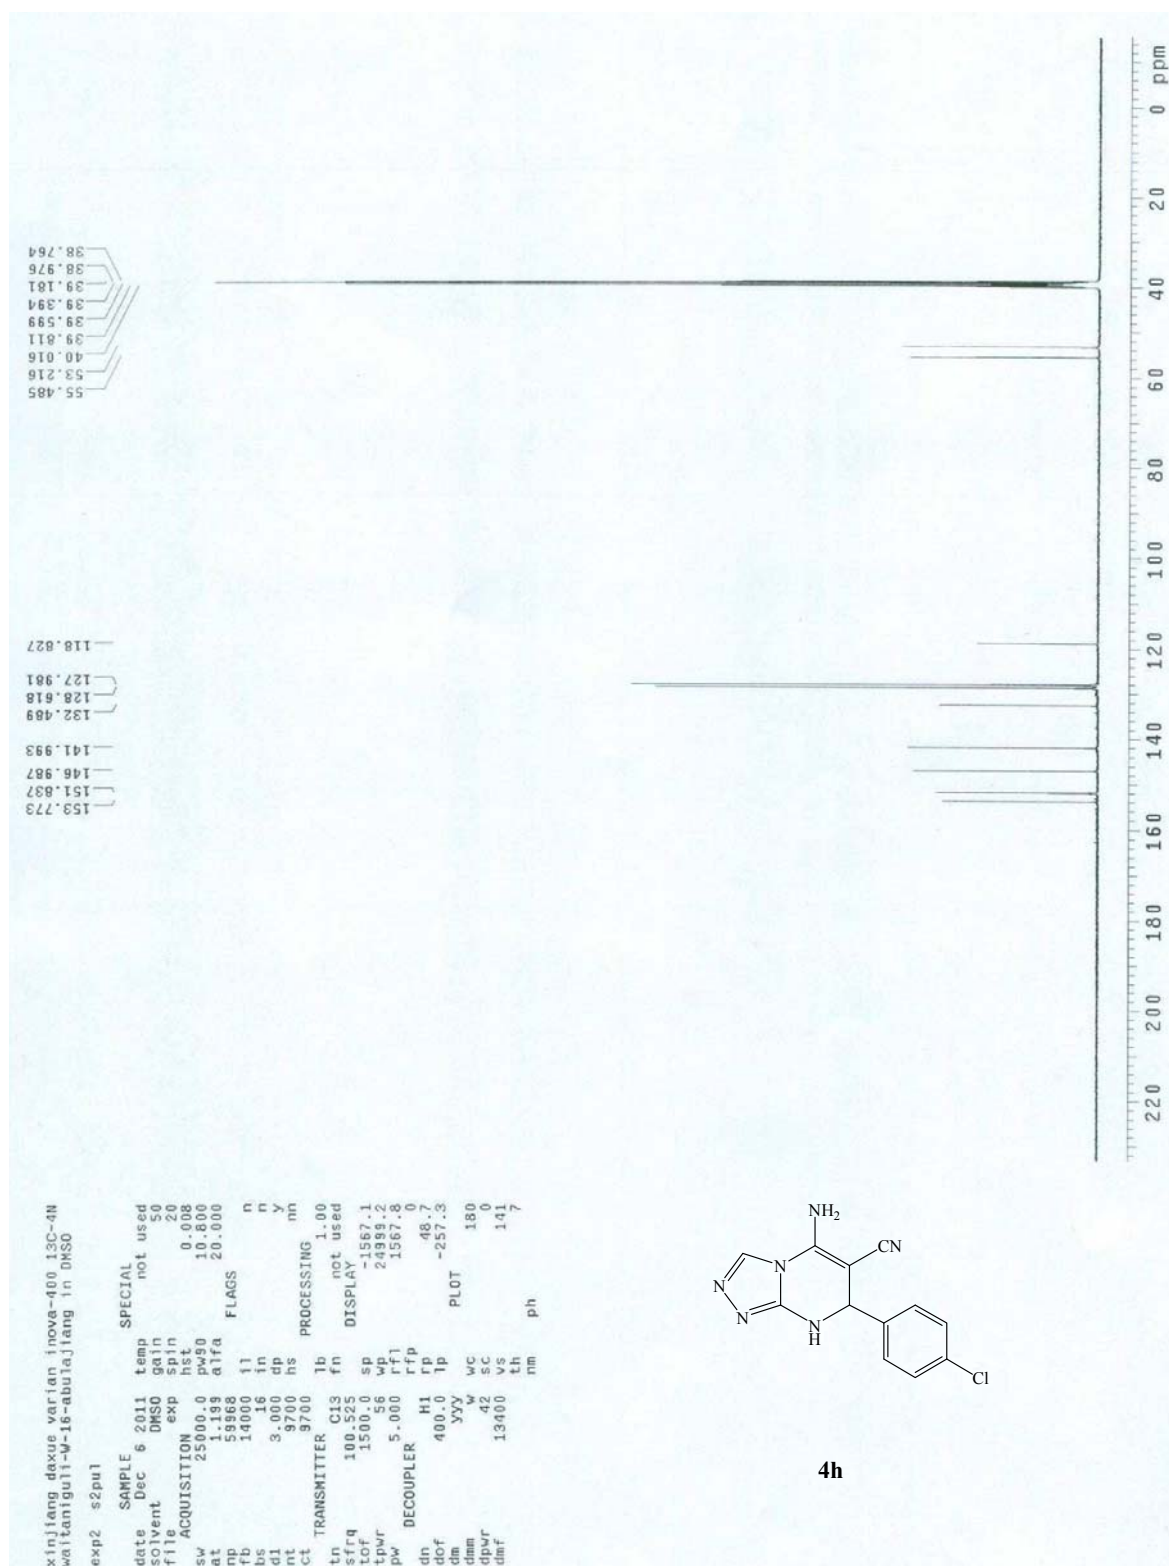

```

xinjiaang daxue varian inova-400 13C-4M
waitangulii-w-22-abuajiang in DMSO
exp2 s2pul
date Dec 1 2011 temp not used
solvent DMSO gain 20
f1freq 125.760 spf 0.008
sw ACQUISITION exp 25000.0 pwr0 10.800
at 1.193 a1fa 20.000
np 59968 f1 14000 f1 n
bs 16 in n
dl 3.000 dp y
nt 10000 hs nn
ct 10000
TRANSMITTER lb 1.00
tn C13 fn not used
sfrq 100.525 DISPLAY
tof 1500.0 sp -1567.1
tpwr 56 wp 24999.2
pw 5.000 rfl 1567.8
DECOUPLER H1 rfp 0
ds 400.0 tp 15.8
dm yyy wc 180
dmp 42 SC 347
dmf 13400 tS 10
nm ph
    
```

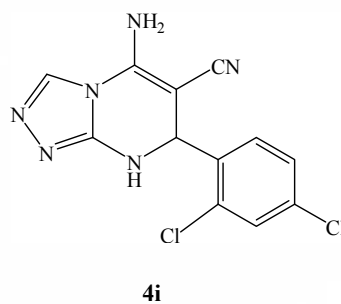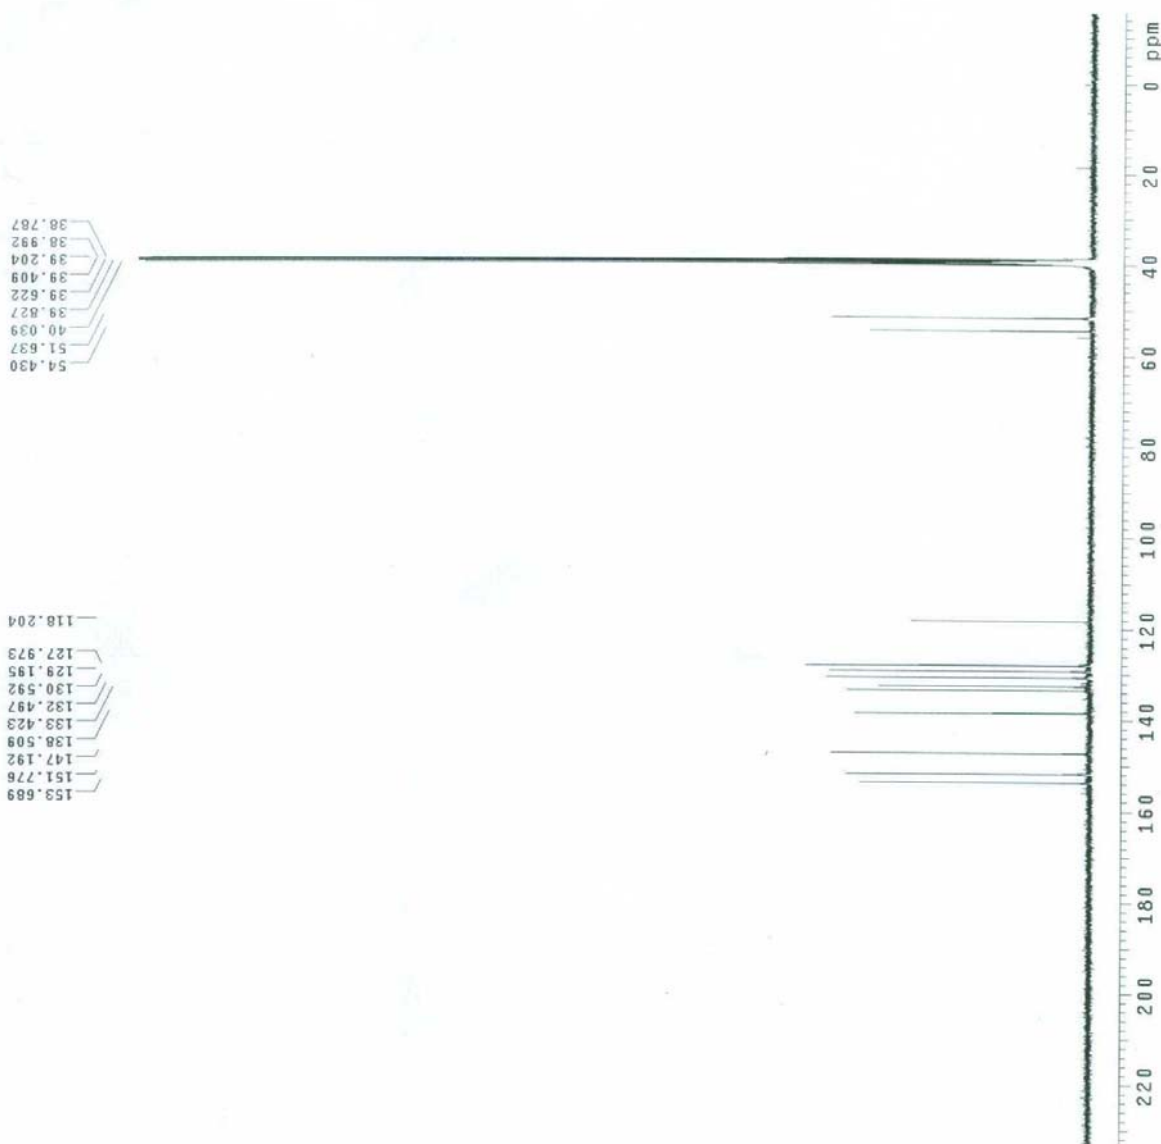

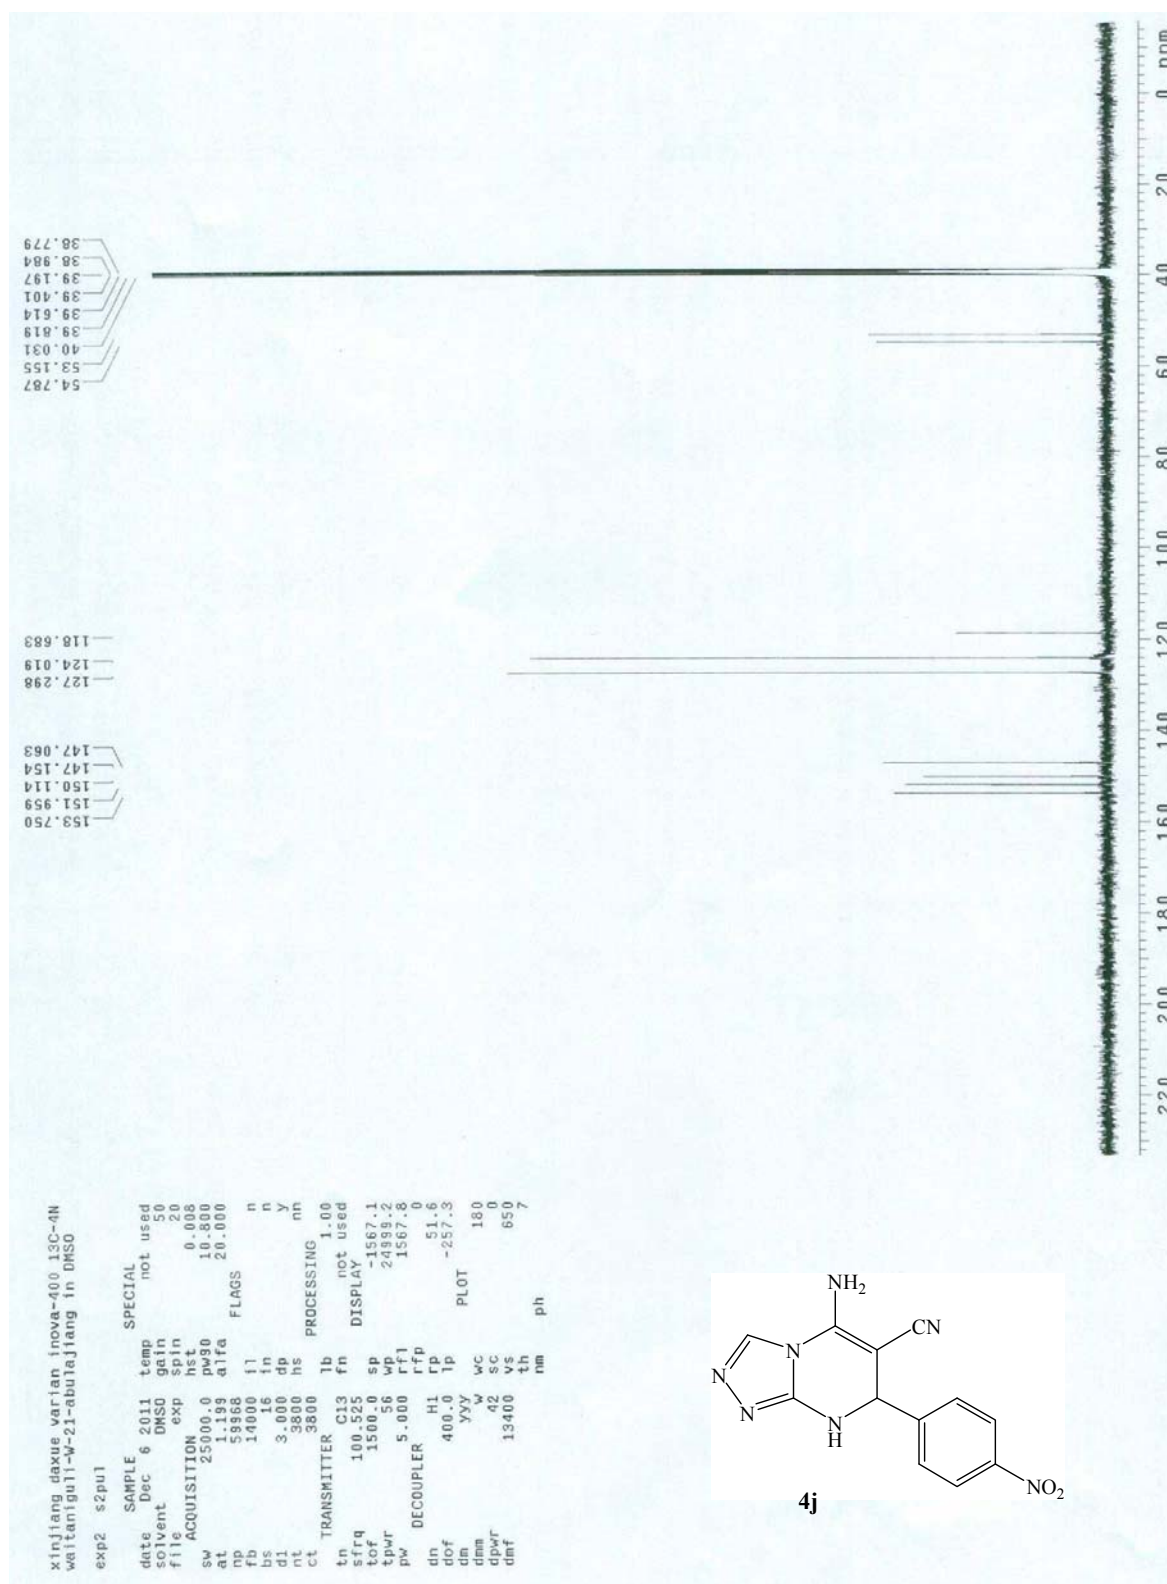



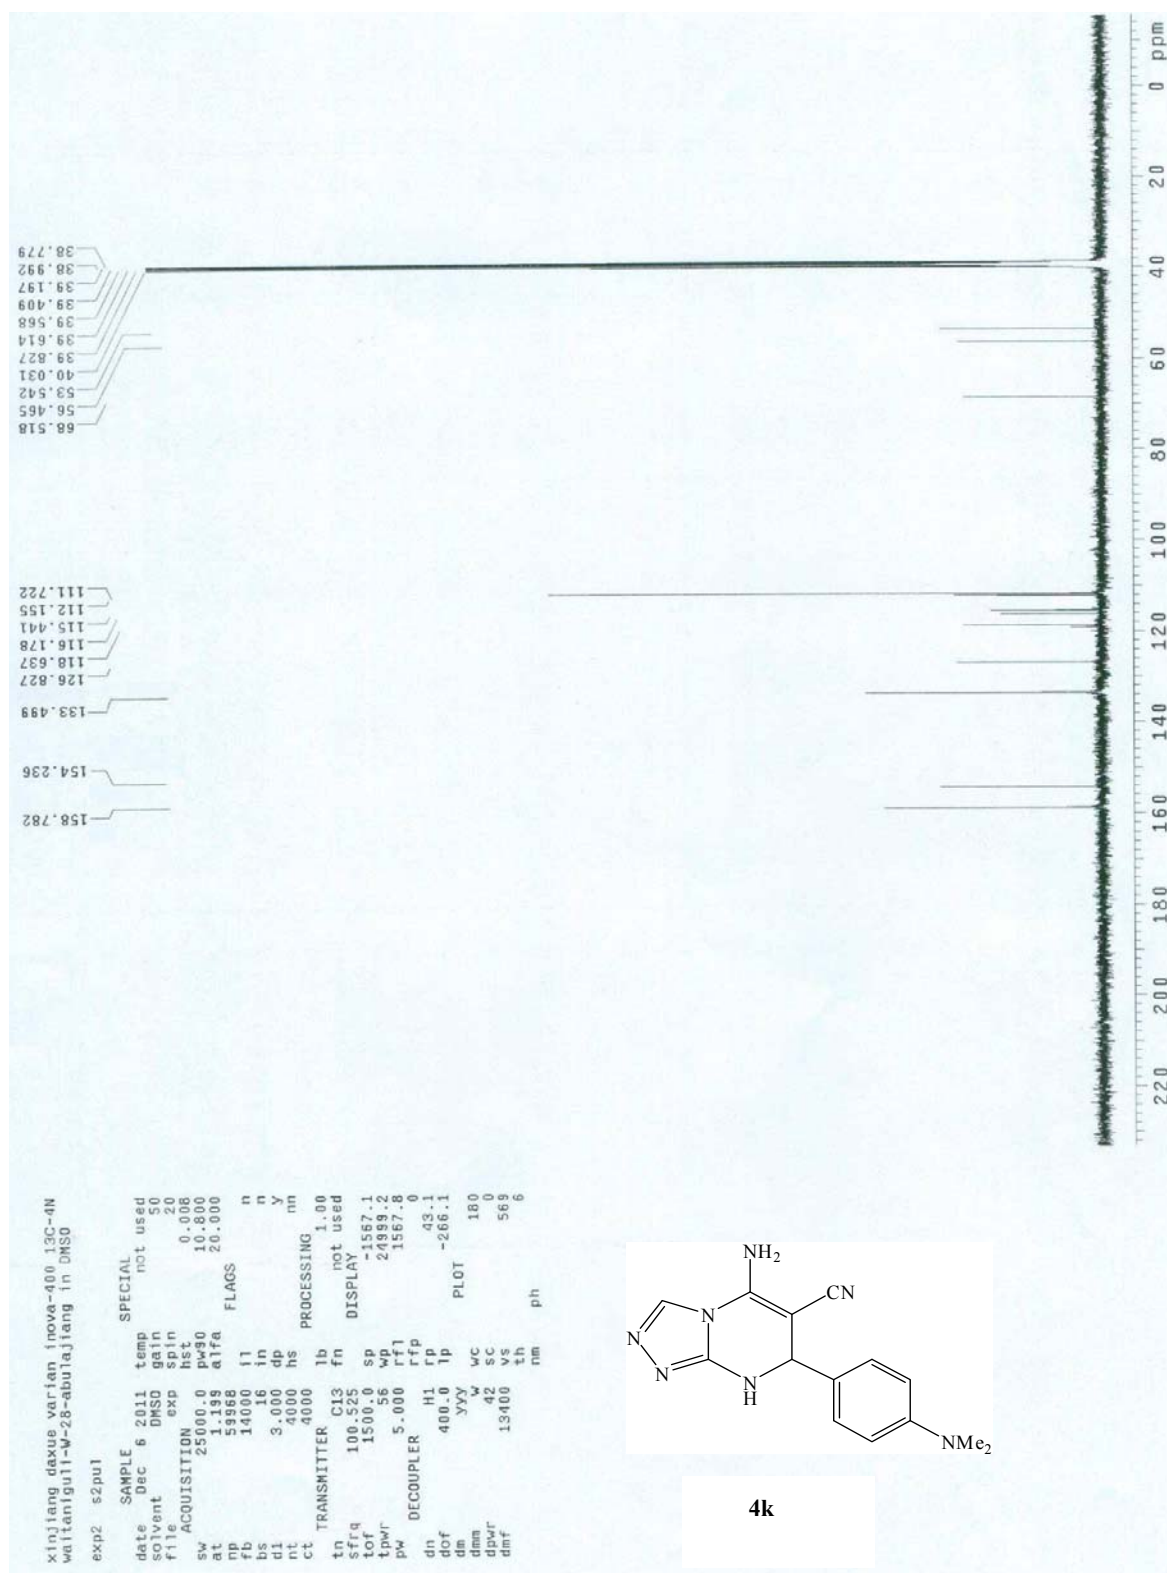

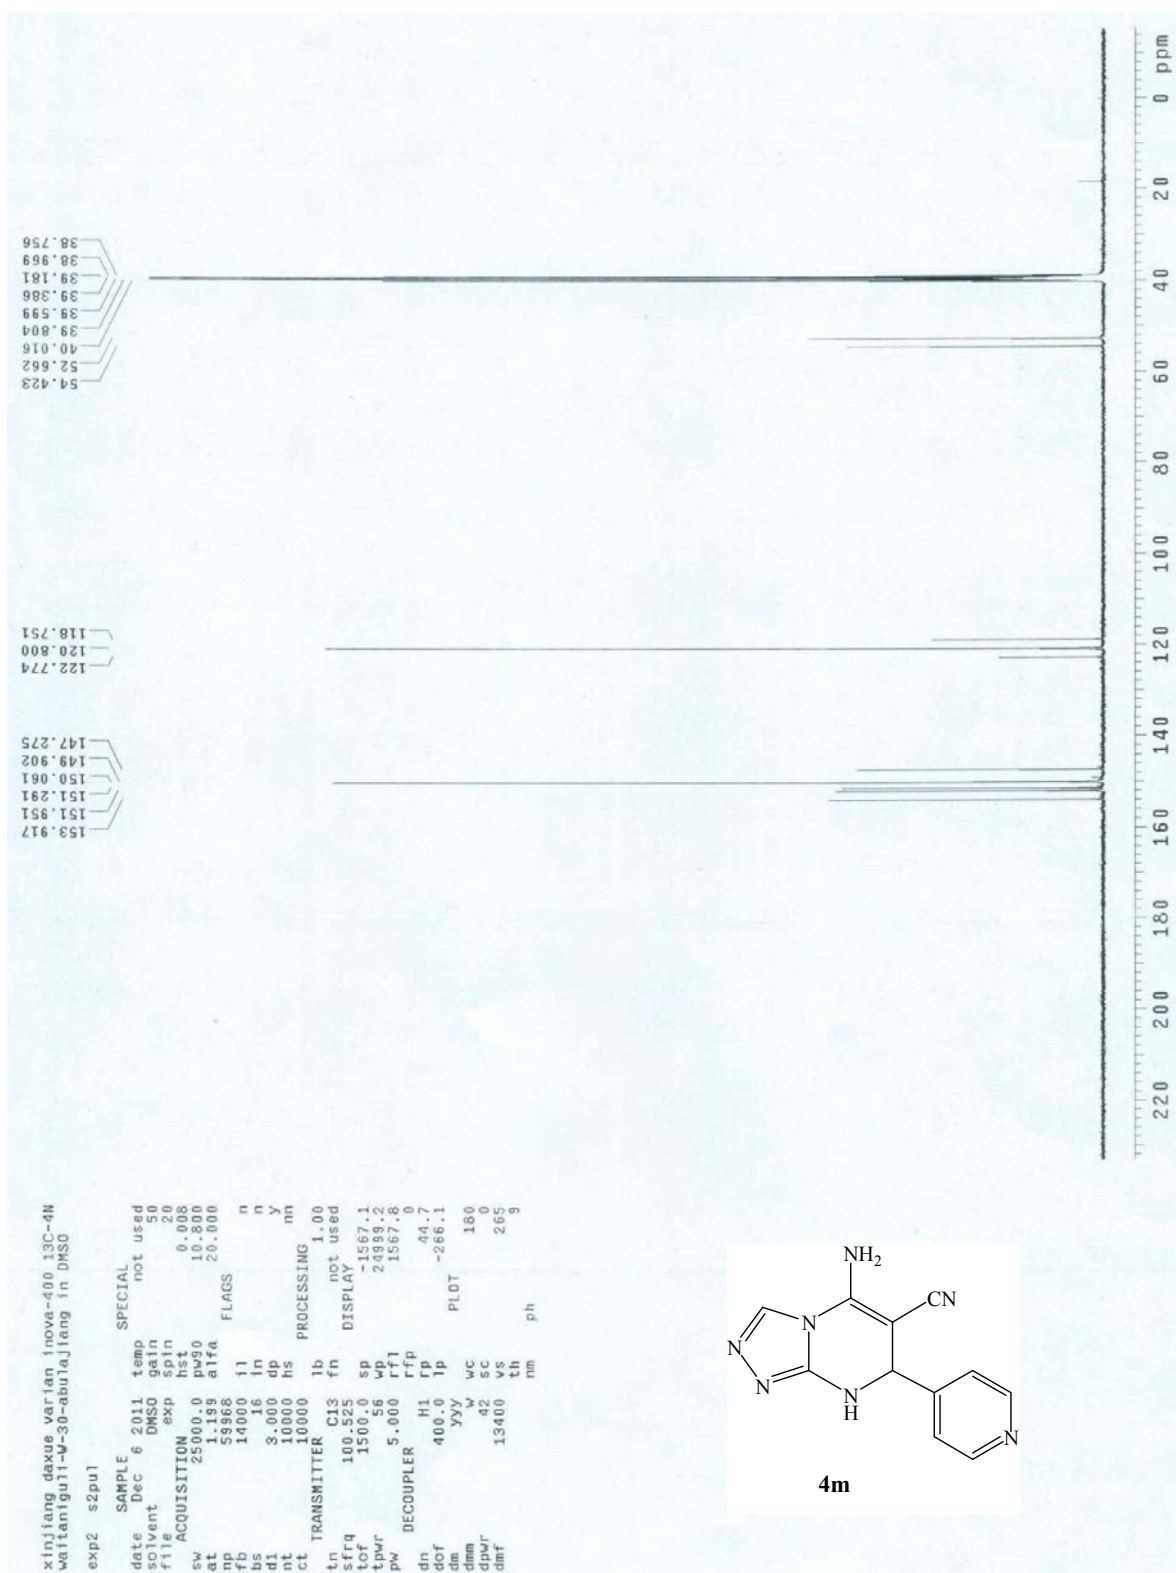

**Figure S7.** IR spectra of products. (A) IR spectrum of **4a**; (B) IR spectrum of **4b**; (C) IR spectrum of **4c**; (D) IR spectrum of **4e**; (E) IR spectrum of **4f**; (F) IR spectrum of **4g**; (G) IR spectrum of **4h**; (H) IR spectrum of **4i**; (I) IR spectrum of **4j**; (J) IR spectrum of **4l**.

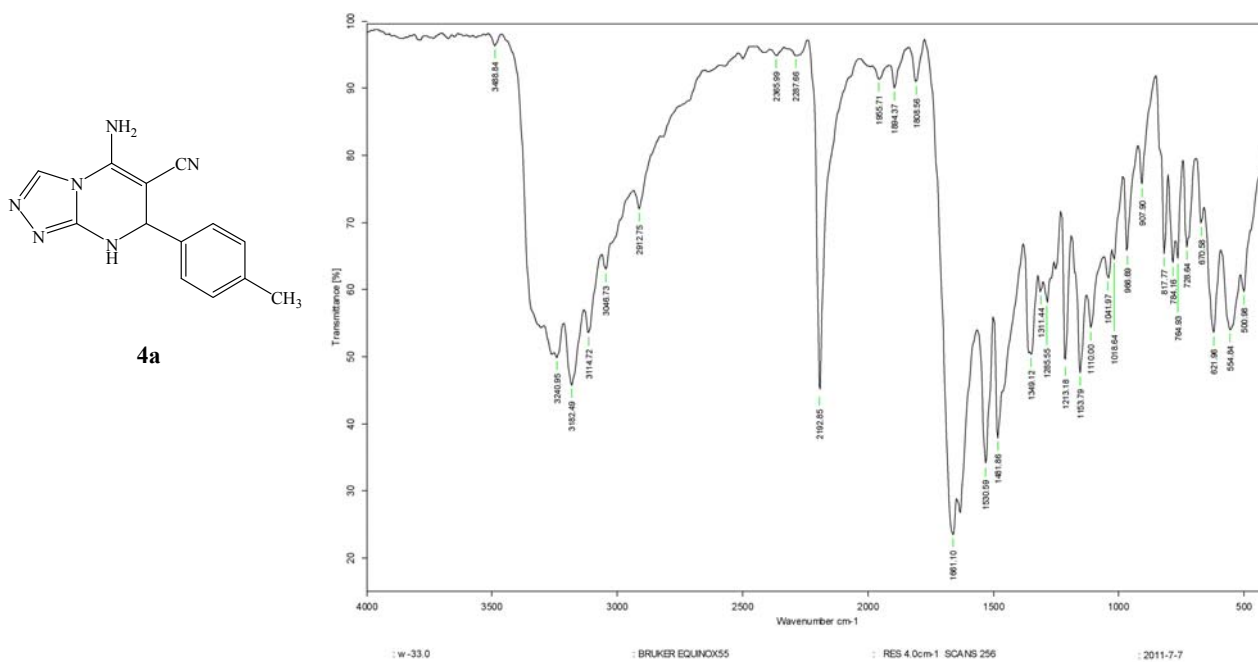

(A)

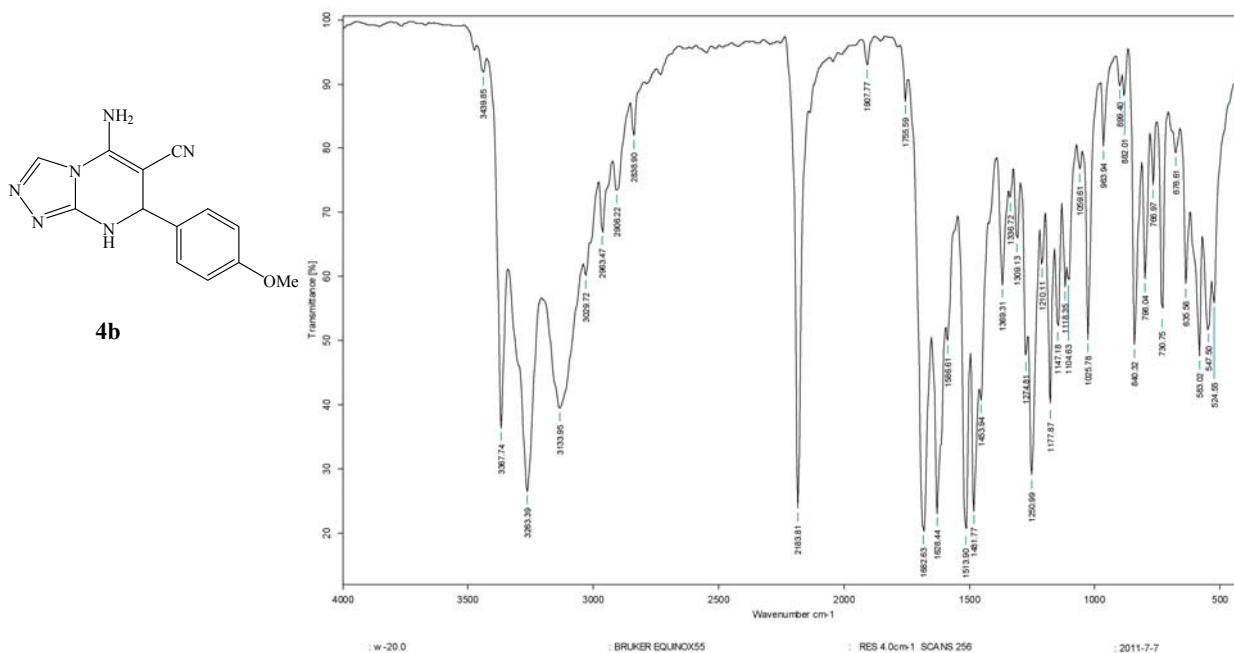

(B)

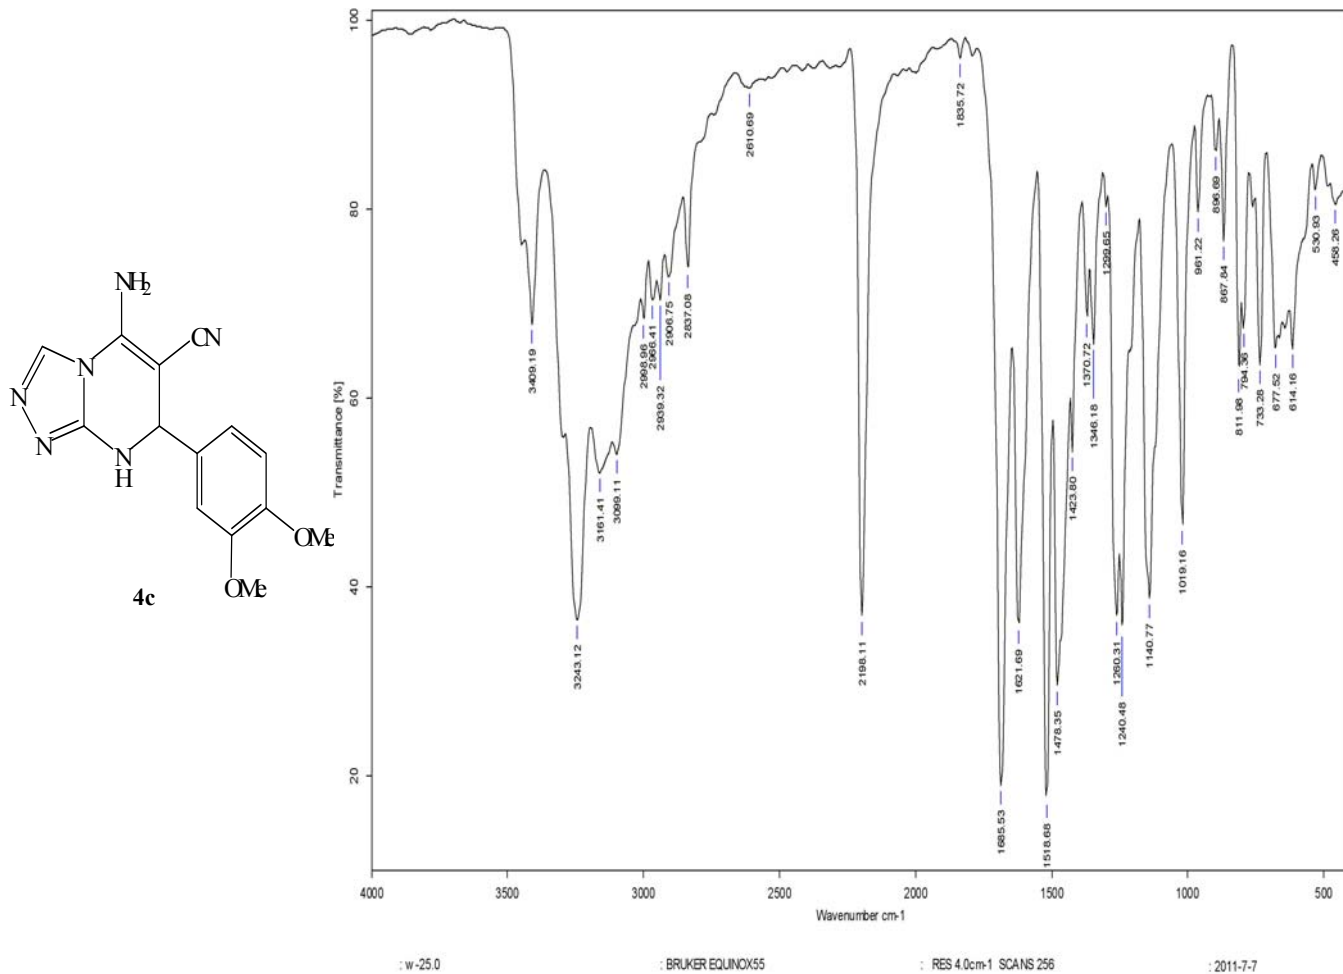

(C)

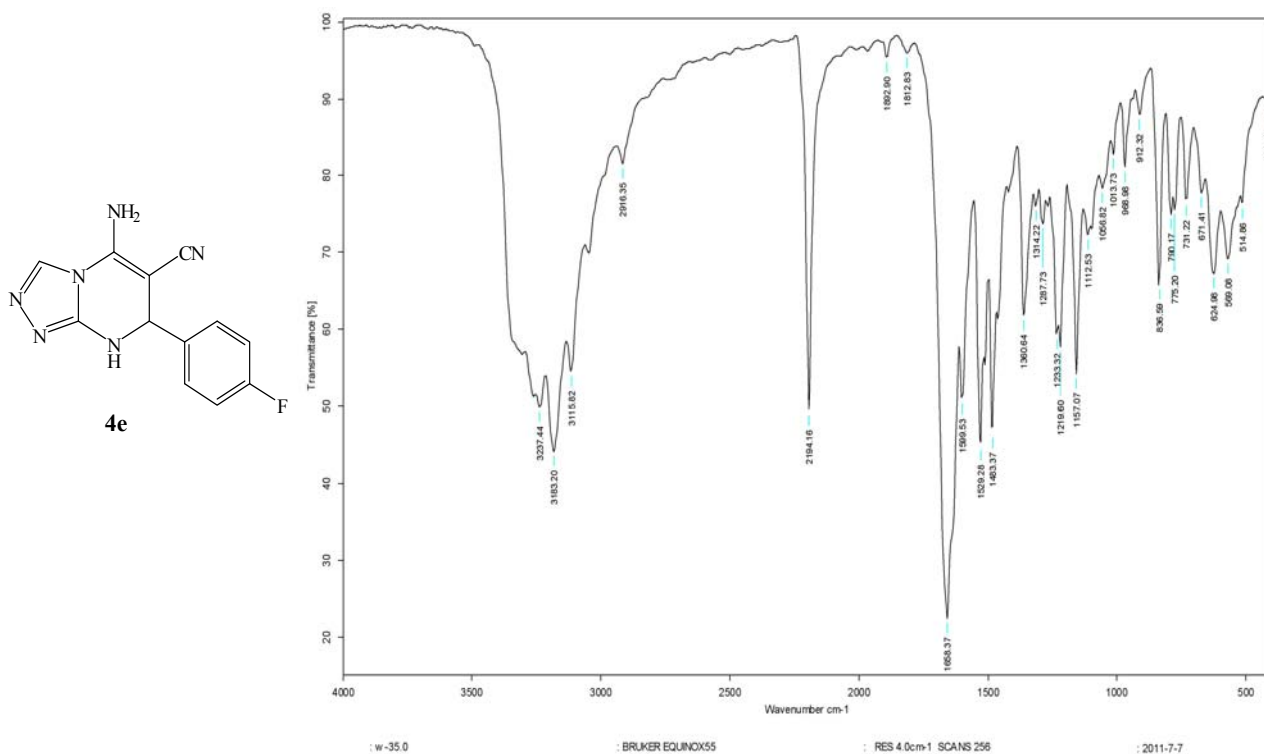

(D)

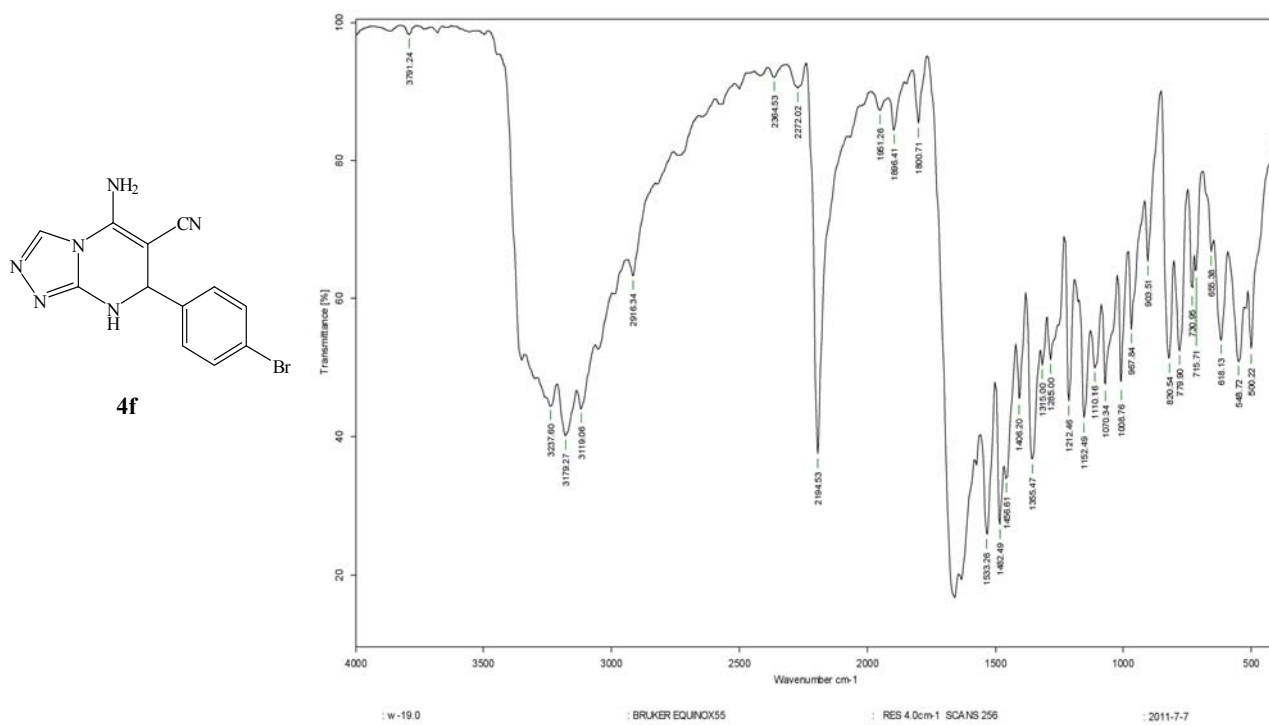

(E)

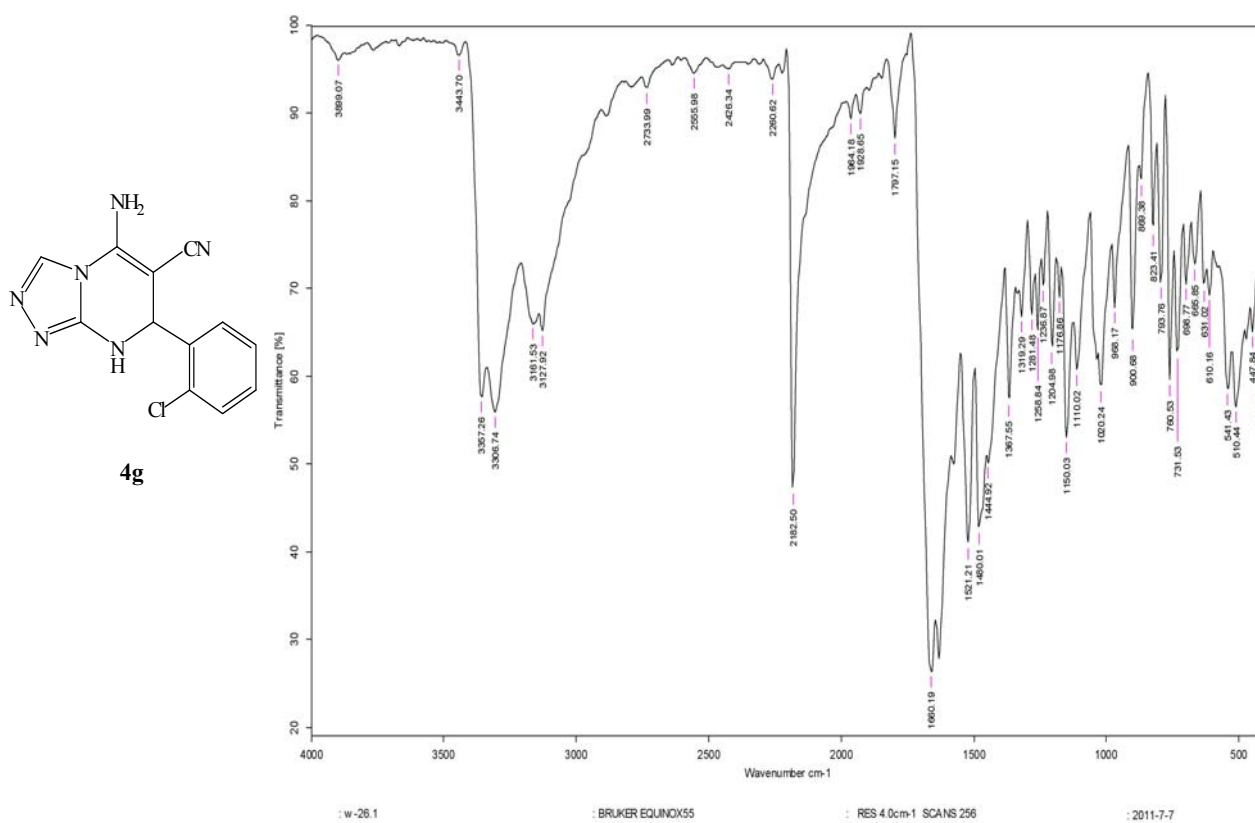

(F)

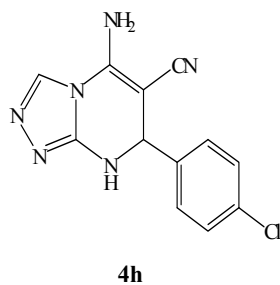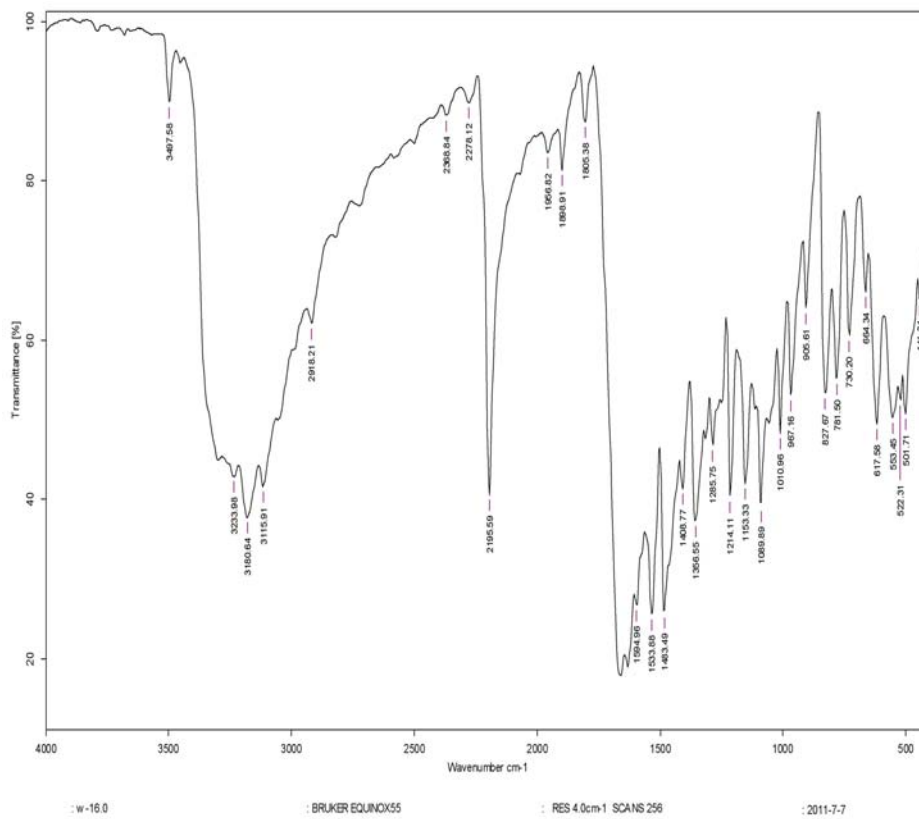

(G)

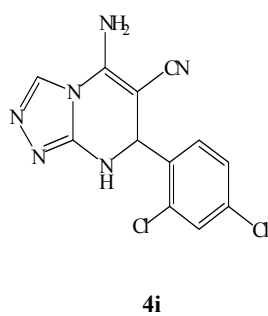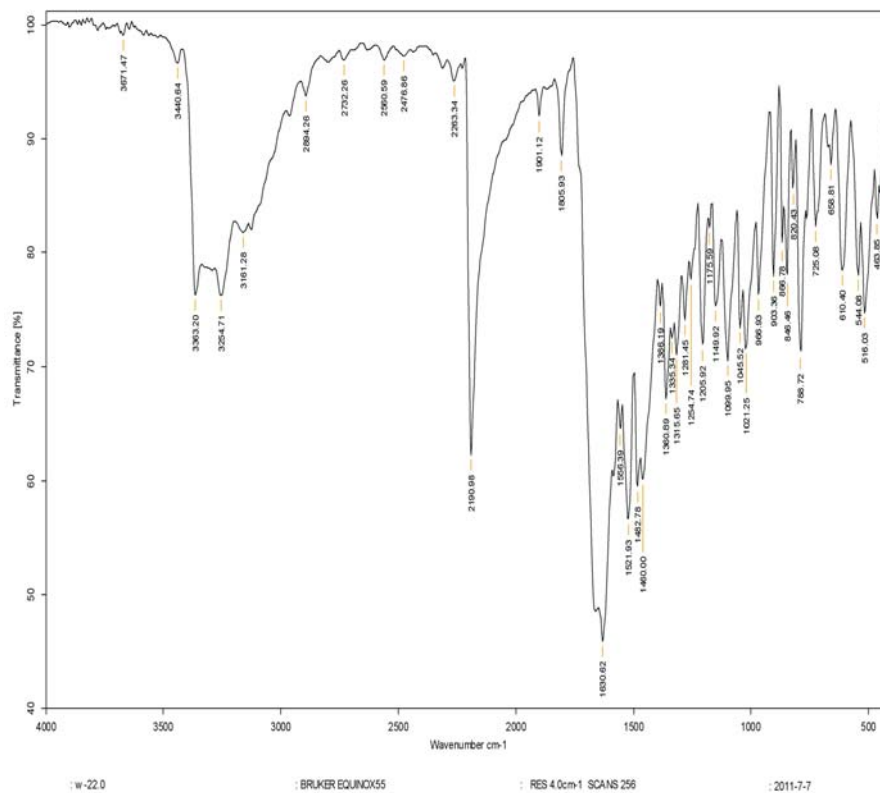

(H)

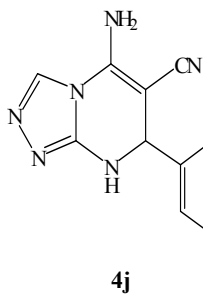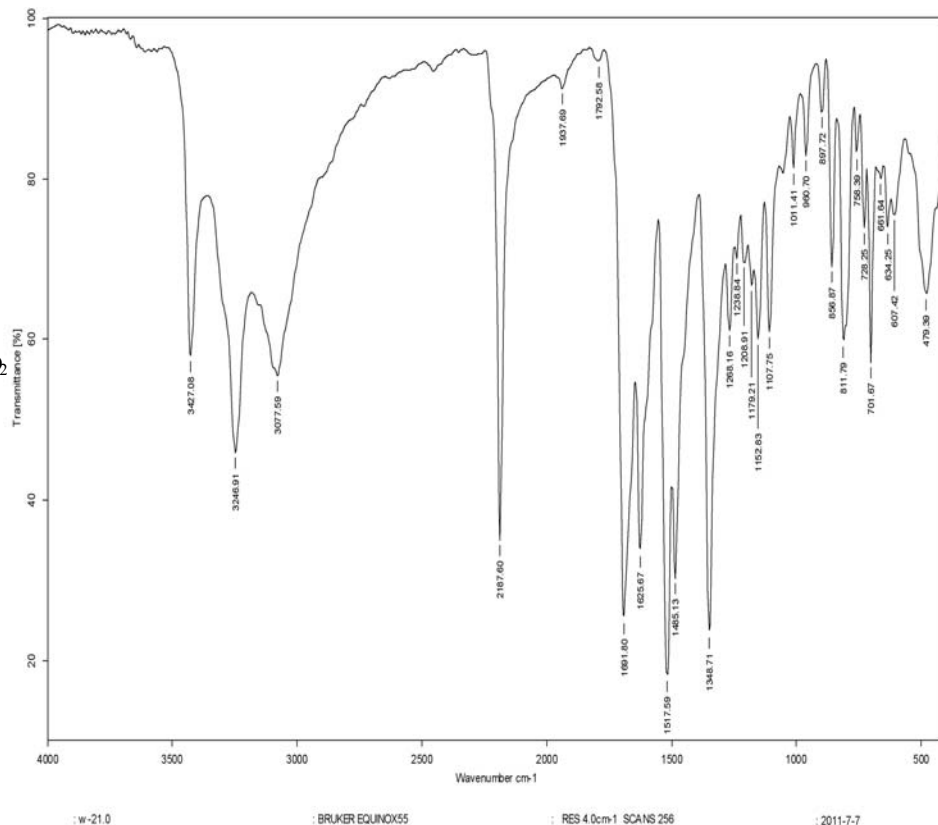

(I)

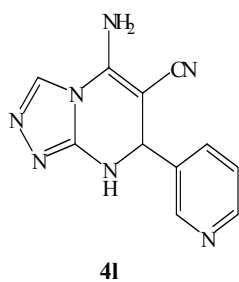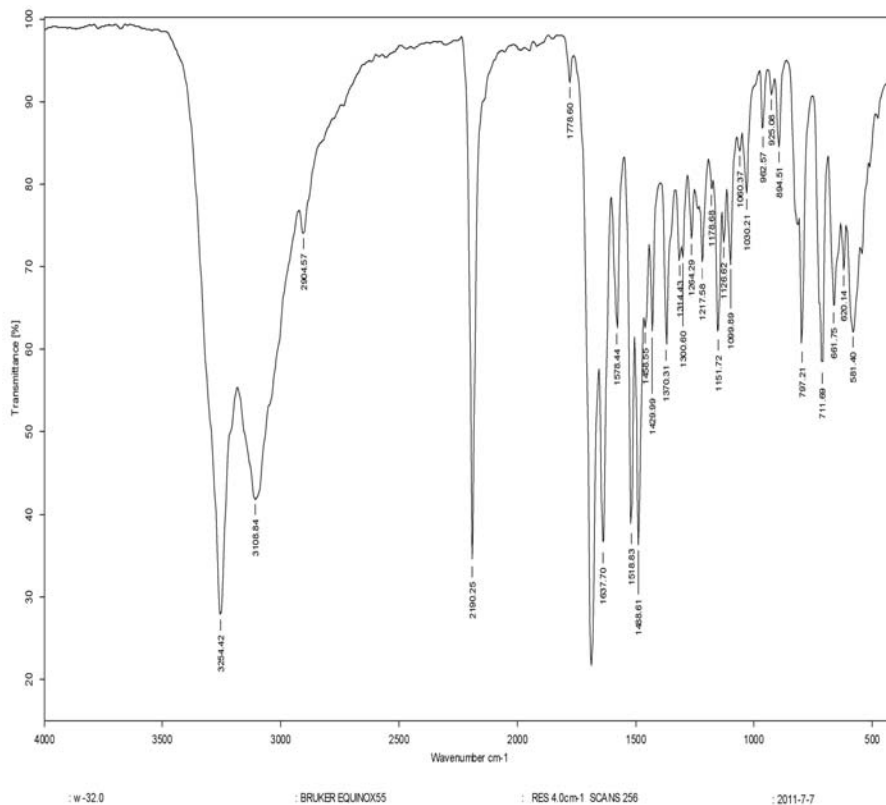

(J)
